# Supplementary material for: Association Between Omega‐3 Fatty Acid Intake and Dyslipidemia: A Continuous Dose–Response Meta‐Analysis of Randomized Controlled Trials
Source: PubMed Central journal article supplement — J Am Heart Assoc. 2023 Jun 2;12(11):e029512. doi: 10.1161/JAHA.123.029512 (PMC10381976; doi:10.1161/jaha.123.029512), 2023-06-02
Supplement: JAH3-12-e029512-s001.pdf [file JAH3-12-e029512-s001.pdf]

# SUPPLEMENTAL MATERIAL

Table S1. Checklist: PRISMA 2020 Main Checklist

| Topic                                | No. | Item                                                                                                                                                                                                                                                                                                 | Location where item is reported |
|--------------------------------------|-----|------------------------------------------------------------------------------------------------------------------------------------------------------------------------------------------------------------------------------------------------------------------------------------------------------|---------------------------------|
| <b>TITLE</b>                         |     |                                                                                                                                                                                                                                                                                                      |                                 |
| <b>Title</b>                         | 1   | Identify the report as a systematic review.                                                                                                                                                                                                                                                          | Line 3-4                        |
| <b>ABSTRACT</b>                      |     |                                                                                                                                                                                                                                                                                                      |                                 |
| <b>Abstract</b>                      | 2   | See the PRISMA 2020 for Abstracts checklist                                                                                                                                                                                                                                                          |                                 |
| <b>INTRODUCTION</b>                  |     |                                                                                                                                                                                                                                                                                                      |                                 |
| <b>Rationale</b>                     | 3   | Describe the rationale for the review in the context of existing knowledge.                                                                                                                                                                                                                          | Line 66-81                      |
| <b>Objectives</b>                    | 4   | Provide an explicit statement of the objective(s) or question(s) the review addresses.                                                                                                                                                                                                               | Line 95-102                     |
| <b>METHODS</b>                       |     |                                                                                                                                                                                                                                                                                                      |                                 |
| <b>Eligibility criteria</b>          | 5   | Specify the inclusion and exclusion criteria for the review and how studies were grouped for the syntheses.                                                                                                                                                                                          | Line 114-121                    |
| <b>Information sources</b>           | 6   | Specify all databases, registers, websites, organisations, reference lists and other sources searched or consulted to identify studies. Specify the date when each source was last searched or consulted.                                                                                            | Line 110-112                    |
| <b>Search strategy</b>               | 7   | Present the full search strategies for all databases, registers and websites, including any filters and limits used.                                                                                                                                                                                 | Line 110-112                    |
| <b>Selection process</b>             | 8   | Specify the methods used to decide whether a study met the inclusion criteria of the review, including how many reviewers screened each record and each report retrieved, whether they worked independently, and if applicable, details of automation tools used in the process.                     | Line 112-113                    |
| <b>Data collection process</b>       | 9   | Specify the methods used to collect data from reports, including how many reviewers collected data from each report, whether they worked independently, any processes for obtaining or confirming data from study investigators, and if applicable, details of automation tools used in the process. | Line 129-128                    |
| <b>Data items</b>                    | 10a | List and define all outcomes for which data were sought. Specify whether all results that were compatible with each outcome domain in each study were sought (e.g. for all measures, time points, analyses), and if not, the methods used to decide which results to collect.                        | Line 140-142                    |
|                                      | 10b | List and define all other variables for which data were sought (e.g. participant and intervention characteristics, funding sources). Describe any assumptions made about any missing or unclear information.                                                                                         | Line 143-149                    |
| <b>Study risk of bias assessment</b> | 11  | Specify the methods used to assess risk of bias in the included studies, including details of the tool(s) used, how many reviewers assessed each study and whether they worked independently, and if applicable, details of automation tools used in the process.                                    | Line 122-126                    |
| <b>Effect measures</b>               | 12  | Specify for each outcome the effect measure(s) (e.g. risk ratio, mean difference) used in the synthesis or presentation of results.                                                                                                                                                                  | Line 140-149                    |

| Topic                                | No. | Item                                                                                                                                                                                                                                                                                 | Location where item is reported                        |
|--------------------------------------|-----|--------------------------------------------------------------------------------------------------------------------------------------------------------------------------------------------------------------------------------------------------------------------------------------|--------------------------------------------------------|
| <b>Synthesis methods</b>             | 13a | Describe the processes used to decide which studies were eligible for each synthesis (e.g. tabulating the study intervention characteristics and comparing against the planned groups for each synthesis (item 5)).                                                                  | Line 163-168,<br>Table S3                              |
|                                      | 13b | Describe any methods required to prepare the data for presentation or synthesis, such as handling of missing summary statistics, or data conversions.                                                                                                                                | Line 142-147                                           |
|                                      | 13c | Describe any methods used to tabulate or visually display results of individual studies and syntheses.                                                                                                                                                                               | Line 142-147                                           |
|                                      | 13d | Describe any methods used to synthesize results and provide a rationale for the choice(s). If meta-analysis was performed, describe the model(s), method(s) to identify the presence and extent of statistical heterogeneity, and software package(s) used.                          | Line 142-147 and<br>Line 157-169                       |
|                                      | 13e | Describe any methods used to explore possible causes of heterogeneity among study results (e.g. subgroup analysis, meta-regression).                                                                                                                                                 | Line 163-168                                           |
|                                      | 13f | Describe any sensitivity analyses conducted to assess robustness of the synthesized results.                                                                                                                                                                                         | Line 154-155                                           |
| <b>Reporting bias assessment</b>     | 14  | Describe any methods used to assess risk of bias due to missing results in a synthesis (arising from reporting biases).                                                                                                                                                              | Line 151-153                                           |
| <b>Certainty assessment</b>          | 15  | Describe any methods used to assess certainty (or confidence) in the body of evidence for an outcome.                                                                                                                                                                                | N/A                                                    |
| <b>RESULTS</b>                       |     |                                                                                                                                                                                                                                                                                      |                                                        |
| <b>Study selection</b>               | 16a | Describe the results of the search and selection process, from the number of records identified in the search to the number of studies included in the review, ideally using a flow diagram.                                                                                         | Line 172-175<br>Figure 1                               |
|                                      | 16b | Cite studies that might appear to meet the inclusion criteria, but which were excluded, and explain why they were excluded.                                                                                                                                                          | Line 72-175,<br>Figure 1                               |
| <b>Study characteristics</b>         | 17  | Cite each included study and present its characteristics.                                                                                                                                                                                                                            | Supp. references<br>and Table S3                       |
| <b>Risk of bias in studies</b>       | 18  | Present assessments of risk of bias for each included study.                                                                                                                                                                                                                         | Table S6                                               |
| <b>Results of individual studies</b> | 19  | For all outcomes, present, for each study: (a) summary statistics for each group (where appropriate) and (b) an effect estimate and its precision (e.g. confidence/credible interval), ideally using structured tables or plots.                                                     | Line 195-218 and<br>Table 1, S4, S5;<br>Figures S2, S3 |
| <b>Results of syntheses</b>          | 20a | For each synthesis, briefly summarise the characteristics and risk of bias among contributing studies.                                                                                                                                                                               | Line 220-259                                           |
|                                      | 20b | Present results of all statistical syntheses conducted. If meta-analysis was done, present for each the summary estimate and its precision (e.g. confidence/credible interval) and measures of statistical heterogeneity. If comparing groups, describe the direction of the effect. | Line 195-259<br>Table S4                               |
|                                      | 20c | Present results of all investigations of possible causes of heterogeneity among study results.                                                                                                                                                                                       | Line 264-267                                           |

| Topic                                                 | No. | Item                                                                                                                                                                                                                                       | Location where item is reported |
|-------------------------------------------------------|-----|--------------------------------------------------------------------------------------------------------------------------------------------------------------------------------------------------------------------------------------------|---------------------------------|
| <b>Reporting biases</b>                               | 20d | Present results of all sensitivity analyses conducted to assess the robustness of the synthesized results.                                                                                                                                 | Line 267-270                    |
|                                                       | 21  | Present assessments of risk of bias due to missing results (arising from reporting biases) for each synthesis assessed.                                                                                                                    | Line 261-264                    |
| <b>Certainty of evidence</b>                          | 22  | Present assessments of certainty (or confidence) in the body of evidence for each outcome assessed.                                                                                                                                        | No                              |
| <b>DISCUSSION</b>                                     |     |                                                                                                                                                                                                                                            |                                 |
| <b>Discussion</b>                                     | 23a | Provide a general interpretation of the results in the context of other evidence.                                                                                                                                                          | Line 278-336                    |
|                                                       | 23b | Discuss any limitations of the evidence included in the review.                                                                                                                                                                            | Line 353-370                    |
|                                                       | 23c | Discuss any limitations of the review processes used.                                                                                                                                                                                      | Line 353-370                    |
|                                                       | 23d | Discuss implications of the results for practice, policy, and future research.                                                                                                                                                             | Line 372-377                    |
| <b>OTHER INFORMATION</b>                              |     |                                                                                                                                                                                                                                            |                                 |
| <b>Registration and protocol</b>                      | 24a | Provide registration information for the review, including register name and registration number, or state that the review was not registered.                                                                                             | N/A                             |
|                                                       | 24b | Indicate where the review protocol can be accessed, or state that a protocol was not prepared.                                                                                                                                             | N/A                             |
|                                                       | 24c | Describe and explain any amendments to information provided at registration or in the protocol.                                                                                                                                            | N/A                             |
| <b>Support</b>                                        | 25  | Describe sources of financial or non-financial support for the review, and the role of the funders or sponsors in the review.                                                                                                              | Line 384-386                    |
| <b>Competing interests</b>                            | 26  | Declare any competing interests of review authors.                                                                                                                                                                                         | Line 388                        |
| <b>Availability of data, code and other materials</b> | 27  | Report which of the following are publicly available and where they can be found: template data collection forms; data extracted from included studies; data used for all analyses; analytic code; any other materials used in the review. | N/A                             |

## PRISMA Abstract Checklist

| Topic                          | No. | Item                                                                                                                                                                                                                                                                                                  | Reported? |
|--------------------------------|-----|-------------------------------------------------------------------------------------------------------------------------------------------------------------------------------------------------------------------------------------------------------------------------------------------------------|-----------|
| <b>TITLE</b>                   |     |                                                                                                                                                                                                                                                                                                       |           |
| <b>Title</b>                   | 1   | Identify the report as a systematic review.                                                                                                                                                                                                                                                           | Yes       |
| <b>BACKGROUND</b>              |     |                                                                                                                                                                                                                                                                                                       |           |
| <b>Objectives</b>              | 2   | Provide an explicit statement of the main objective(s) or question(s) the review addresses.                                                                                                                                                                                                           | Yes       |
| <b>METHODS</b>                 |     |                                                                                                                                                                                                                                                                                                       |           |
| <b>Eligibility criteria</b>    | 3   | Specify the inclusion and exclusion criteria for the review.                                                                                                                                                                                                                                          | Yes       |
| <b>Information sources</b>     | 4   | Specify the information sources (e.g. databases, registers) used to identify studies and the date when each was last searched.                                                                                                                                                                        | Yes       |
| <b>Risk of bias</b>            | 5   | Specify the methods used to assess risk of bias in the included studies.                                                                                                                                                                                                                              | No        |
| <b>Synthesis of results</b>    | 6   | Specify the methods used to present and synthesize results.                                                                                                                                                                                                                                           | Yes       |
| <b>RESULTS</b>                 |     |                                                                                                                                                                                                                                                                                                       |           |
| <b>Included studies</b>        | 7   | Give the total number of included studies and participants and summarise relevant characteristics of studies.                                                                                                                                                                                         | Yes       |
| <b>Synthesis of results</b>    | 8   | Present results for main outcomes, preferably indicating the number of included studies and participants for each. If meta-analysis was done, report the summary estimate and confidence/credible interval. If comparing groups, indicate the direction of the effect (i.e. which group is favoured). | Yes       |
| <b>DISCUSSION</b>              |     |                                                                                                                                                                                                                                                                                                       |           |
| <b>Limitations of evidence</b> | 9   | Provide a brief summary of the limitations of the evidence included in the review (e.g. study risk of bias, inconsistency and imprecision).                                                                                                                                                           | No        |
| <b>Interpretation</b>          | 10  | Provide a general interpretation of the results and important implications.                                                                                                                                                                                                                           | Yes       |
| <b>OTHER</b>                   |     |                                                                                                                                                                                                                                                                                                       |           |
| <b>Funding</b>                 | 11  | Specify the primary source of funding for the review.                                                                                                                                                                                                                                                 | No        |
| <b>Registration</b>            | 12  | Provide the register name and registration number.                                                                                                                                                                                                                                                    | No        |

*From:* Page MJ, McKenzie JE, Bossuyt PM, Boutron I, Hoffmann TC, Mulrow CD, et al. The PRISMA 2020 statement: an updated guideline for reporting systematic reviews. MetaArXiv. 2020, September 14. DOI: 10.31222/osf.io/v7gm2. For more information, visit: [www.prisma-statement.org](http://www.prisma-statement.org)

**Table S2. Literature retrieval strategies for online databases**

| Database | Search Strategy                                                                                                                                                                                                                                                                                                                                                                                                                                                                                                                                                                                                                                                                                                                                              |
|----------|--------------------------------------------------------------------------------------------------------------------------------------------------------------------------------------------------------------------------------------------------------------------------------------------------------------------------------------------------------------------------------------------------------------------------------------------------------------------------------------------------------------------------------------------------------------------------------------------------------------------------------------------------------------------------------------------------------------------------------------------------------------|
| PubMed   | <p>#1 (“Dietary fats, unsaturated” [MH] OR “fish oils” [MH] OR “fish oil” [tiab] OR “fatty acids, omega-3”[MH] OR “docosahexaenoic acid” [tiab] OR "Docosahexaenoic Acids" [tiab] OR “PUFA” [tiab] OR “DHA” [tiab] OR “EPA” [tiab] OR “long chain omega-3 fatty acids” [tiab] OR “polyunsaturated fatty acid” [tiab] OR "Docosahexaenoic Acids" [tiab] OR “eicosapentaenoic acid” [tiab])</p> <p>#2 (“Hyperlipidemias”[MH] OR “Hyperlipemia”[ tiab] OR “Lipidemia”[ tiab] OR “Hypolipidemic Agents”[MH] OR “Antihyperlipemics”[ tiab] OR “antilipemic”[ tiab] OR “Hypolipidemic Drug”[tiab] OR “hyperlipoproteinemia”[ tiab] OR “dyslipidemic”[tiab] OR “hypercholesterolemia”[tiab] OR “hypertriglyceridemic”[tiab])</p> <p>#1 AND #2 AND “human study”</p> |
| Embase   | <p>#1 (‘fish oils’:ab,ti) OR (‘omega-3 fatty acids’:ab,ti) OR (‘docosahexaenoic acids’:ab,ti) OR (‘PUFA’:ab,ti) OR (‘DHA’:ab,ti) OR (‘EPA’:ab,ti) OR (‘ALA’:ab,ti ) OR (‘long chain omega-3 fatty acids’:ab,ti) OR (‘polyunsaturated fatty acid’:ab,ti) OR (‘eicosapentaenoic acid’:ab,ti) OR (‘alpha linolenic acid’:ab,ti)</p> <p>#2 (‘Hyperlipemia’:ab,ti) OR (‘Lipidemia’:ab,ti) OR (‘Antihyperlipemics’:ab,ti) OR (‘Hyperlipidemias’:ab,ti) OR (‘dyslipidemic’:ab,ti) OR (‘hypercholesterolemia’:ab,ti) OR (‘hypertriglyceridemic’:ab,ti) OR (‘Hypolipidemic Drug’:ab,ti) OR (‘Hypolipidemic Agents’:ab,ti)</p> <p>#1 AND #2 AND 'human'/de</p>                                                                                                         |

**Table S3. Summary of study characteristics of 90 trials in the lipid profile study**

| Author                    | Year | Country   | n, M/F   | Age, y<br>Mean (SE/SD)     | BMI,<br>kg/m <sup>2</sup><br>Mean<br>(SE/SD) | HL    | Lipid-<br>lowering | CHD   | DHA<br>dose g/d | EPA<br>dose g/d | Total<br>dose g/d | Control                      | Duration,<br>week |
|---------------------------|------|-----------|----------|----------------------------|----------------------------------------------|-------|--------------------|-------|-----------------|-----------------|-------------------|------------------------------|-------------------|
| Flaten <sup>57</sup>      | 1990 | Norway    | M56      | t39.9 ± 2.4<br>c39.3 ± 2.7 | NR                                           | no    | no                 | no    | 2.87            | 3.59            | 6.46              | olive oil                    | 6                 |
| Hendra <sup>58</sup>      | 1990 | UK        | M55F25   | t56.0<br>c55.8             | NR                                           | no    | no                 | mixed | 1.20            | 1.80            | 3.00              | olive oil                    | 6                 |
| Reis <sup>59</sup>        | 1990 | USA       | NR89     | t60±10<br>c57±9            | NR                                           | mixed | mixed              | yes   | 2.50            | 3.70            | 6.20              | olive oil                    | 26                |
|                           |      |           |          | t60±10<br>c57±9            | NR                                           | mixed | mixed              | yes   | 1.40            | 3.40            | 4.80              | olive oil                    | 26                |
| Bonaa <sup>60</sup>       | 1992 | Norway    | M95F61   | 49±7                       | 26±3.3                                       | no    | no                 | no    | 1.80            | 3.30            | 5.10              | corn oil                     | 10                |
| Kaul <sup>61</sup>        | 1992 | India     | M91F16   | t56±11<br>c59±9            | NR                                           | NR    | NR                 | yes   | 1.20            | 1.80            | 3.00              | Conventional<br>treatment    | 26                |
| Leaf <sup>62</sup>        | 1994 | USA       | M353F94  | t57.9<br>c57.6             | NR                                           | NR    | NR                 | yes   | 2.80            | 4.10            | 6.90              | corn oil                     | 13                |
| Sacks <sup>63</sup>       | 1995 | USA       | M55F4    | t62 ± 7<br>c62 ± 7         | NR                                           | NR    | mixed              | yes   | 1.92            | 2.88            | 4.80              | olive oil                    | 120               |
| Shimizu <sup>64</sup>     | 1995 | Japan     | M22/F23  | t66.3±2.5<br>c58.6±1.8     | t23.9 ± 1<br>c22.8 ±1.2                      | NR    | NR                 | NR    | 0.00            | 0.90            | 0.90              | Routine<br>treatment         | 52                |
| Eritsland <sup>65</sup>   | 1996 | Norway    | M530F80  | t60<br>c60                 | t25<br>c25                                   | NR    | NR                 | yes   | 1.28            | 2.04            | 3.32              | Aspirin or<br>warfarin       | 52                |
| Grimsgaard <sup>66</sup>  | 1997 | Norway    | M224     | 44± 5                      | t24.9 ±2.6<br>c24.6±2.7                      | no    | no                 | no    | 3.60            | —               | 3.60              | corn oil                     | 7                 |
|                           |      |           |          | 44± 5                      | t25.6 ±2.9<br>c24.6±2.7                      | no    | no                 | no    | —               | 3.80            | 3.80              | corn oil                     | 7                 |
| Harris <sup>67</sup>      | 1997 | USA       | M30F12   | t46± 11<br>c45 ± 9         | t28 ± 4<br>c29± 5                            | yes   | no                 | no    | 1.56            | 1.80            | 3.36              | corn oil                     | 16                |
| Sirtori <sup>68</sup>     | 1997 | Italy     | M583F352 | t58.2± 9.1<br>c58.8 ± 9    | NR                                           | yes   | no                 | no    | 1.05            | 1.53            | 2.58              | olive oil                    | 9                 |
| Borthwick <sup>69</sup>   | 1998 | UK        | M44F11   | t54.1± 9.2<br>c52.8± 9.2   | NR                                           | yes   | no                 | no    | 1.56            | 1.80            | 3.36              | corn oil                     | 12                |
| Nordoy <sup>70</sup>      | 1998 | Norway    | M29F12   | t46.8± 9.2<br>c46.7 ± 7.8  | t27.6 ± 4<br>c28.8± 3.7                      | yes   | yes                | mixed | 1.56            | 1.80            | 3.36              | corn oil                     | 5                 |
| Johansen <sup>71</sup>    | 1999 | Norway    | M301F87  | t60.3± 9.3<br>c59.1 ± 9.3  | t25.6 ± 3<br>c26.3± 3.5                      | NR    | mixed              | yes   | 2.34            | 2.70            | 5.04              | corn oil                     | 26                |
| von Schacky <sup>72</sup> | 1999 | Germany   | M179F44  | t57.8± 9.7<br>c58.9 ± 8.1  | NR                                           | mixed | mixed              | yes   | 0.65            | 1.06            | 1.71              | Non-ω3 fatty<br>acid mixture | 104               |
| Mori <sup>73</sup>        | 2000 | Australia | M56      | t49.1 ±2.2<br>c48.4±2      | t24.9 ±2.6<br>c 24.6±2.7                     | yes   | no                 | no    | 3.68            | —               | 3.68              | olive oil                    | 6                 |
|                           |      |           |          | t 48.9 ± 1.7<br>c48.4±2    | t25.6 ±2.9<br>c 24.6±2.7                     | yes   | no                 | no    | —               | 3.84            | 3.84              | olive oil                    | 6                 |
| Durrington <sup>74</sup>  | 2001 | UK        | M43F16   | t55.2± 7<br>c54.8 ± 10.2   | t28.8± 2.8<br>c28.4 ±4.2                     | yes   | yes                | yes   | 1.44            | 1.76            | 3.20              | corn oil                     | 24                |

|                          |      |         |          |                             |                         |       |       |       |      |      |      |                              |       |
|--------------------------|------|---------|----------|-----------------------------|-------------------------|-------|-------|-------|------|------|------|------------------------------|-------|
| Finnegan <sup>75</sup>   | 2003 | UK      | M53F38   | t53± 2<br>c55 ± 2           | t27.2±0.6<br>c25.8 ±0.6 | yes   | no    | no    | 0.22 | 0.33 | 0.55 | sunflower and safflower oils | 26    |
|                          |      |         |          | t54± 2<br>c55 ± 2           | t26.1±0.6<br>c25.8 ±0.6 | yes   | no    | no    | 0.66 | 0.75 | 1.40 | sunflower and safflower oils | 26    |
| Hamazaki <sup>76</sup>   | 2003 | Japan   | M25F16   | t44± 11<br>c48 ± 11         | t25±3<br>c24 ±3         | mixed | no    | NR    | 0.26 | 0.60 | 0.86 | olive oil                    | 12    |
| Dyerberg <sup>77</sup>   | 2004 | Denmark | M51      | t39.2± 10.5<br>c37.6 ± 10.6 | t24.9±3.2<br>c24.1 ±3.7 | no    | no    | no    | 0.50 | 0.79 | 1.30 | palm oil                     | 8     |
| Hjerkinn <sup>78</sup>   | 2005 | Norway  | M563     | 70 (64-76)                  | 26.5±3.5                | yes   | mixed | mixed | 0.80 | 1.40 | 2.20 | corn oil                     | 156   |
|                          |      |         |          | 70 (64-76)                  | 26.5±3.5                | yes   | mixed | mixed | 0.80 | 1.40 | 2.20 | corn oil                     | 156   |
| Maki <sup>79</sup>       | 2005 | USA     | M31F26   | t55.8±2.3<br>c51.4±2.6      | t29.6±0.9<br>c30.5±0.9  | NR    | no    | NR    | 1.52 | —    | 1.52 | olive oil                    | 6     |
| Geppert <sup>80</sup>    | 2006 | Germany | M87F27   | t25.7± 5.4<br>c26.1 ± 5.8   | t21.4±1.8<br>c21.2±2    | no    | no    | no    | 0.94 | —    | 0.94 | olive oil                    | 8     |
| Lee <sup>81</sup>        | 2006 | UK      | M71F6    | t59± 10<br>c55 ±10          | t28±4<br>c27±4          | mixed | mixed | yes   | 0.39 | 0.45 | 0.84 | "usual care"                 | 13    |
| Sanders <sup>82</sup>    | 2006 | UK      | M39F40   | 29.8-35.2                   | 23-24                   | no    | no    | no    | 1.52 | 0.00 | 1.52 | olive oil                    | 4     |
| Davidson <sup>83</sup>   | 2007 | USA     | M146F108 | t60.3± 10.1<br>c59.3±10.8   | t31±5.4<br>c31.5±5.5    | yes   | yes   | no    | 1.50 | 1.86 | 3.36 | vegetable oil                | 8     |
| Mita <sup>84</sup>       | 2007 | Japan   | M36F24   | t59± 11.2<br>c61.2 ±8.4     | t25±5.4<br>c24.5±3      | mixed | mixed | no    | —    | 1.80 | 1.80 | Routine treatment            | 110   |
| Satoh <sup>85</sup>      | 2007 | Japan   | M16F28   | t51.6± 2.8<br>c51.6 ±3.2    | t31±1.2<br>c29.2±0.9    | mixed | no    | NR    | 0.00 | 1.80 | 1.80 | Diet alone                   | 13    |
| Kaul <sup>86</sup>       | 2008 | Canada  | M34F54   | t34.4±1.8<br>c32.9 ±2.0     | t25.1±0.6<br>c24.4±0.8  | no    | no    | no    | 0.24 | 0.35 | 0.59 | sunflower oil                | 12    |
| Saito <sup>87</sup>      | 2008 | Japan   | M486F471 | 58± 9                       | 25± 3                   | yes   | yes   | no    | —    | 1.80 | 1.80 | statin only                  | 239.2 |
| Shidfar <sup>88</sup>    | 2008 | Iran    | M24F26   | t53.4±11.7<br>c54.1±11.1    | t28.4±0.5<br>c29±0.7    | NR    | no    | no    | 0.96 | 1.04 | 2.00 | mixed oil                    | 10    |
| Ebrahimi <sup>89</sup>   | 2009 | Iran    | M11F79   | t53.5±12.7<br>c52.3±11.1    | t30.3±5.2<br>c30.4±6.1  | NR    | NR    | NR    | 0.12 | 0.18 | 0.30 | Routine treatment            | 26    |
| Hartwich <sup>90</sup>   | 2009 | Poland  | M14F27   | t54.5±1.2<br>c55.5±1.4      | t34.5±0.6<br>c34.6±0.6  | NR    | no    | NR    | 0.52 | 0.72 | 1.24 | sunflower oil                | 12    |
| Khandelwal <sup>91</sup> | 2009 | India   | M79F7    | t48.2±0.9<br>c46.1±0.9      | t25.7±0.6<br>c24.3±0.5  | yes   | no    | no    | 0.63 | 1.26 | 1.89 | safflower oil                | 4     |
| Nomura <sup>92</sup>     | 2009 | Japan   | M101F90  | 65±3                        | 27.3±3.9                | yes   | yes   | mixed | —    | 1.80 | 1.80 | Routine treatment            | 26    |
| Rizza <sup>93</sup>      | 2009 | Italy   | M25F25   | 31.1 ± 5.8                  | t26.1±5.9<br>c25.8±4.6  | NR    | no    | no    | 0.76 | 0.94 | 1.70 | olive oil                    | 12    |
| Satoh <sup>94</sup>      | 2009 | Japan   | M39F53   | t51.3±2.1<br>c52.2±2.1      | t30±0.6<br>c30±0.7      | yes   | no    | NR    | —    | 1.80 | 1.80 | Diet alone                   | 13    |
| Bays <sup>95</sup>       | 2010 | USA     | M142F103 | t56.3±9.6<br>c56±10.8       | t30.2±4.6<br>c31.0±4.0  | yes   | yes   | NR    | 1.50 | 1.86 | 3.36 | corn oil                     | 16    |
| Hallund <sup>96</sup>    | 2010 | Denmark | M68      | t52±9<br>c53±9              | t24.2±2.3<br>c25.0±2.1  | no    | no    | no    | 2.00 | 0.90 | 2.90 | chicken                      | 8     |
|                          |      |         |          | t54±7<br>c53±9              | t25±2.4<br>c25±2.1      | no    | no    | no    | 0.47 | 0.21 | 0.68 | chicken                      | 8     |



|                           |      |             |             |                           |                        |       |       |       |      |      |      |                                      |       |
|---------------------------|------|-------------|-------------|---------------------------|------------------------|-------|-------|-------|------|------|------|--------------------------------------|-------|
| Kromhout <sup>97</sup>    | 2010 | Netherlands | M1904F524   | t69.1±5.6<br>c68.9±5.6    | NR                     | mixed | mixed | yes   | 0.15 | 0.23 | 0.38 | oleic acid in the margarine          | 175   |
| Neil <sup>98</sup>        | 2010 | UK          | M187F139    | t63±12<br>c64±11          | t30.7±6.2<br>c30.6±6   | NR    | no    | no    | 0.76 | 0.92 | 1.68 | olive oil                            | 17    |
|                           |      |             | M194F138    | t65±11<br>c63±12          | t30.8±6.4<br>c30.8±5.9 | NR    | yes   | no    | 0.76 | 0.92 | 1.68 | olive oil                            | 17    |
| Zhang <sup>99</sup>       | 2010 | China       | M62         | t49.8±8.5<br>c51.1±6.2    | t26.7±2.8<br>c26.9±3.5 | yes   | no    | no    | 1.72 | 1.11 | 2.83 | pork, chicken, beef                  | 8     |
| Bays <sup>100</sup>       | 2011 | USA         | M175F54     | t53.4±9.3<br>c53.4±8.3    | t30.8±4.2<br>c31±4.3   | yes   | yes   | no    | —    | 2.00 | 2.00 | liquid paraffin                      | 12    |
|                           |      |             |             | t51.9±10.3<br>c53.4±8.3   | t30.4±4.3<br>c31±4.3   | yes   | yes   | no    | —    | 4.00 | 4.00 | liquid paraffin                      | 12    |
| Itakura <sup>101</sup>    | 2011 | Japan       | M5150F11247 | t61±8<br>c61±9            | t24±3.2<br>c24.1±3.3   | yes   | yes   | no    | —    | 1.80 | 1.80 | statin only                          | 239.2 |
| Kim <sup>102</sup>        | 2011 | Korea       | M25F36      | t56.7±13<br>c59.4±10.3    | t25.9±3.1<br>c25.7±3.3 | yes   | yes   | mixed | 1.50 | 1.86 | 3.36 | statin only                          | 6     |
| Krysiak <sup>103</sup>    | 2011 | Poland      | M43F23      | t53.1±3.5<br>c52.5±3.1    | t28.6±2.8<br>c28.3±2.4 | yes   | no    | no    | 0.75 | 0.93 | 1.68 | Placebo                              | 12    |
| Krysiak <sup>104</sup>    | 2011 | Poland      | M34F20      | t52.9±2.6<br>c53.1±2.4    | t28.4±2.2<br>c28.7±2.9 | yes   | no    | no    | 0.75 | 0.93 | 1.68 | Placebo                              | 13    |
| Nodari <sup>105</sup>     | 2011 | Italy       | M120F13     | t61±11<br>c64±9           | t25.9±2.3<br>c25.7±2.2 | mixed | mixed | no    | 1.97 | 2.36 | 4.33 | olive oil                            | 52    |
| Sanders <sup>106</sup>    | 2011 | UK          | M142F225    | 55 (53-57)                | 25-27                  | NR    | mixed | no    | 0.18 | 0.27 | 0.45 | olive oil and peppermint oil         | 52    |
|                           |      |             |             | 55 (53-57)                | 25-27                  | NR    | mixed | no    | 0.36 | 0.54 | 0.90 | olive oil and peppermint oil         | 52    |
|                           |      |             |             | 55 (53-57)                | 25-27                  | NR    | mixed | no    | 0.72 | 1.08 | 1.80 | olive oil and peppermint oil         | 52    |
| Schuchardt <sup>107</sup> | 2011 | Germany     | M45F53      | t61±10.1<br>c62±8.2       | t26±2.7<br>c26±3.3     | yes   | yes   | no    | 0.67 | 1.01 | 1.68 | corn oil                             | 26    |
|                           |      |             |             | t61.6±7.5<br>c62±8.2      | t26±2.7<br>c25.8±3.0   | yes   | yes   | no    | 0.67 | 1.01 | 1.68 | corn oil                             | 26    |
| Takaki <sup>108</sup>     | 2011 | Japan       | M41F9       | t61.6±5.6<br>c60.9±7      | t25.1±2.3<br>c24±3.6   | yes   | yes   | yes   | 0.00 | 1.80 | 1.80 | statin only                          | 48    |
| Tierney <sup>109</sup>    | 2011 | Europe      | NR          | t55.4±1<br>c54.7±0.9      | t32.4±0.4<br>c32.5±0.4 | NR    | no    | NR    | 0.52 | 0.72 | 1.24 | sunflower oil                        | 12    |
| Agouridis <sup>110</sup>  | 2012 | Greece      | M22F26      | c58±11<br>t57±16          | t30±5<br>c30±4         | yes   | yes   | no    | 0.38 | 0.47 | 0.84 | statin only                          | 12    |
| Ballantyne <sup>111</sup> | 2012 | USA         | M287F179    | t61.1±10.0<br>c61.2±10.0  | t32.7±4.9<br>c33.0±5.0 | yes   | yes   | no    | 0.00 | 4.00 | 4.00 | Placebo with statin                  | 12    |
|                           |      |             | M289F180    | t61.8±9.42<br>c61.2±10.05 | t32.9±4.9<br>c33.0±5.0 | yes   | yes   | no    | 0.00 | 2.00 | 2.00 | Placebo with statin                  | 12    |
| Derosa <sup>112</sup>     | 2012 | Italy       | M79F78      | NR                        | t26.0±1.3<br>c27.2±1.9 | yes   | no    | NR    | 1.35 | 1.20 | 2.55 | sucrose, mannitol, and mineral salts | 24    |
| Bosch <sup>20</sup>       | 2012 | USA         | M8150F4386  | t63.5±7.8<br>c63.6±7.9    | t29.8±5.3<br>c29.9±5.2 | mixed | mixed | NR    | 0.38 | 0.47 | 0.84 | olive oil                            | 16    |
| Koh <sup>113</sup>        | 2012 | Korea       | M57F40      | t55±1<br>c54±1            | t25.5±0.3<br>c25.1±0.3 | yes   | no    | yes   | 0.76 | 0.92 | 1.68 | Placebo                              | 8     |

|                              |      |        |            |                              |                            |       |       |     |      |      |      |                                        |     |
|------------------------------|------|--------|------------|------------------------------|----------------------------|-------|-------|-----|------|------|------|----------------------------------------|-----|
| Satoh-Asahara <sup>114</sup> | 2012 | Japan  | M48F34     | t52.3 ± 13<br>c54.0 ± 13     | t29.9 ± 4.9<br>c29.1 ± 5.3 | yes   | no    | NR  | —    | 1.80 | 1.80 | control                                | 12  |
| Flock <sup>115</sup>         | 2013 | USA    | M60F55     | t25.8 ± 1.5<br>c25.7 ± 1.4   | t23.4 ± 0.5<br>c24.6 ± 0.6 | no    | no    | no  | 0.12 | 0.19 | 0.31 | placebo                                | 21  |
|                              |      |        |            | t27.1 ± 1.6<br>c25.7 ± 1.4   | t24.5 ± 0.6<br>c24.6 ± 0.6 | no    | no    | no  | 0.24 | 0.37 | 0.61 | placebo                                | 21  |
|                              |      |        |            | t25.8 ± 1.3<br>c25.7 ± 1.4   | t24.0 ± 0.4<br>c24.6 ± 0.6 | no    | no    | no  | 0.35 | 0.56 | 0.91 | placebo                                | 21  |
|                              |      |        |            | t26.0 ± 1.2<br>c25.7 ± 1.4   | t25.4 ± 0.6<br>c24.6 ± 0.6 | no    | no    | no  | 0.70 | 1.10 | 1.80 | placebo                                | 21  |
| Roncaglioni <sup>21</sup>    | 2013 | Italy  | M7687F4823 | t63.9 ± 9.3<br>c64.0 ± 9.6   | t29.3 ± 4.9<br>c29.4 ± 5.0 | mixed | mixed | NR  | 0.38 | 0.46 | 0.84 | olive oil                              | 152 |
| Hlais <sup>116</sup>         | 2013 | USA    | M112       | NR                           | t25.3 ± 2.6<br>c26.4 ± 3.0 | no    | no    | no  | 0.39 | 0.99 | 1.38 | sunflower oil                          | 12  |
| Maki <sup>47</sup>           | 2013 | USA    | M259F172   | t60.1 ± 9.2<br>c61.5 ± 9.6   | t33.3 ± 6.6<br>c32.7 ± 5.3 | yes   | yes   | NR  | 0.80 | 2.20 | 3.00 | olive oil                              | 6   |
| Tani <sup>117</sup>          | 2013 | Japan  | M106F38    | t62 ± 10<br>c63 ± 10         | t25.3 ± 3.7<br>c26.3 ± 4.0 | yes   | mixed | no  | 0.00 | 1.80 | 1.80 | Non-EPA treatment                      | 24  |
| Maki <sup>118</sup>          | 2014 | USA    | M36F37     | t52.6 ± 1.7<br>c52.5 ± 2.0   | t32.7 ± 1.0<br>c31.2 ± 0.7 | yes   | mixed | NR  | 1.77 | 0.66 | 2.43 | corn/soy oil                           | 14  |
|                              |      |        | M26F30     | t54.5 ± 2.0<br>c52.5 ± 2.0   | t31.9 ± 1.6<br>c31.2 ± 0.7 | yes   | mixed | NR  | 0.82 | 1.16 | 1.98 | corn/soy oil                           | 14  |
| Oh <sup>119</sup>            | 2014 | Korea  | M45F41     | t55 ± 9<br>c54 ± 9           | t26.3 ± 3.2<br>c26.5 ± 2.7 | yes   | no    | no  | 0.38 | 0.47 | 0.84 | placebo                                | 8   |
|                              |      |        | M46F39     | t54 ± 9<br>c54 ± 9           | t26.3 ± 3.2<br>c26.5 ± 2.7 | yes   | no    | no  | 0.75 | 0.93 | 1.68 | placebo                                | 8   |
|                              |      |        | M46F40     | t55 ± 8<br>c54 ± 9           | t26.3 ± 3.2<br>c26.5 ± 2.7 | yes   | no    | no  | 1.50 | 1.86 | 3.36 | placebo                                | 8   |
| Scorletti <sup>120</sup>     | 2014 | UK     | M60F43     | t48.6 ± 11.1<br>c54.0 ± 9.6  | t34.3 ± 5.8<br>c32.0 ± 4.3 | NR    | no    | NR  | 1.52 | 1.84 | 3.36 | olive oil                              | 66  |
| Toyama <sup>121</sup>        | 2014 | Japan  | M67F13     | t65.9 ± 8.2<br>c68.7 ± 10.6  | t24.3 ± 2.9<br>c24.8 ± 2.9 | yes   | yes   | yes | 0.00 | 1.80 | 1.80 | statin only                            | 12  |
| Mansoori <sup>122</sup>      | 2015 | Iran   | NR         | t55.8 ± 7.6<br>c56.0 ± 7.0   | t29.2 ± 2.8<br>c27.4 ± 3.7 | yes   | NR    | NR  | 1.45 | 0.40 | 1.85 | paraffin oil                           | 8   |
| Qin <sup>48</sup>            | 2015 | China  | M51F19     | t46.0 ± 10.6<br>c44.3 ± 10.9 | t26.4 ± 3.9<br>c26.0 ± 2.8 | yes   | no    | NR  | 0.52 | 0.73 | 1.24 | corn oil                               | 12  |
| Ahn <sup>123</sup>           | 2016 | Korea  | M50F24     | t59.6 ± 9.1<br>c60.7 ± 0.8   | t24.8 ± 2.4<br>c24.5 ± 2.5 | yes   | yes   | yes | 1.13 | 1.40 | 2.52 | placebo                                | 48  |
| Bays <sup>124</sup>          | 2016 | USA    | M60F27     | t53.5 ± 8.8<br>c51.6 ± 11.4  | t31.7 ± 4.4<br>c32.3 ± 4.5 | yes   | mixed | no  | —    | 0.60 | 0.60 | Miglyol:<br>medium-chain<br>fatty acid | 12  |
| Derosa <sup>125</sup>        | 2016 | Italy  | M131F127   | t53.4 ± 11.2<br>c54.8 ± 12.1 | t28.9 ± 2.4<br>c28.9 ± 2.4 | yes   | NR    | no  | 1.36 | 1.64 | 3.00 | sucrose,<br>mannitol, etc              | 72  |
| Koh <sup>126</sup>           | 2016 | Korea  | M78F68     | t54 ± 1<br>c54 ± 1           | t25.4 ± 0.4<br>c25.3 ± 0.4 | yes   | yes   | no  | 0.76 | 0.92 | 1.68 | fenofibrate<br>only                    | 8   |
| Sawada <sup>127</sup>        | 2016 | Japan  | M87F20     | t67.8 ± 9.1<br>c68.9 ± 8.8   | t25.3 ± 2.9<br>c25.4 ± 2.4 | yes   | mixed | NR  | —    | 1.80 | 1.80 | Non-EPA<br>placebo                     | 24  |
| Su <sup>128</sup>            | 2017 | Taiwan | M166F87    | t54.7<br>c54.4               | t26.61<br>c26.66           | yes   | no    | no  | 0.76 | 0.92 | 1.68 | olive oil                              | 8   |

|                          |      |          |            |                          |                        |       |       |       |      |      |      |                            |     |
|--------------------------|------|----------|------------|--------------------------|------------------------|-------|-------|-------|------|------|------|----------------------------|-----|
|                          |      |          |            | t53.7<br>c54.4           | t26.63,<br>c26.66      | yes   | no    | no    | 1.52 | 1.86 | 3.38 | olive oil                  | 8   |
| Tani <sup>129</sup>      | 2017 | Japan    | M88F12     | t67.5±10.1<br>c67.3±10.4 | t24.6±3.2<br>c24.8±4.0 | yes   | yes   | yes   | —    | 1.80 | 1.80 | standard statin<br>only    | 26  |
| Tani <sup>130</sup>      | 2017 | Japan    | M93F13     | t68 ± 11<br>c66 ± 11     | t24.2±2.7<br>c24.7±4.1 | yes   | yes   | yes   | 0.00 | 1.80 | 1.80 | standard statin<br>only    | 26  |
| Toth <sup>131</sup>      | 2017 | Slovakia | M52F53     | 60.7±12.3                | 28.3± 3.8              | yes   | yes   | no    | 1.56 | 0.47 | 2.03 | statins only               | 12  |
| Watanabe <sup>132</sup>  | 2017 | Japan    | M159F34    | t67±10<br>c68±10         | t23.7±3.1<br>c23.9±2.9 | yes   | yes   | yes   | —    | 1.80 | 1.80 | pitavastatin<br>only       | 28  |
| Group <sup>133</sup>     | 2018 | UK       | M9684F5796 | t63.3±9.2<br>c63.3±9.2   | t30.7±6.3<br>c30.8±6.2 | NR    | mixed | no    | 0.38 | 0.46 | 0.84 | olive oil                  | 130 |
| Kim <sup>134</sup>       | 2018 | Korea    | M126F75    | t59.7±10.8<br>c56.6±10.5 | t27.4±3.7<br>c27.6±3.6 | yes   | yes   | no    | 1.52 | 1.84 | 3.36 | rosuvastatin<br>only       | 8   |
| Oscarsson <sup>135</sup> | 2018 | Sweden   | M30F21     | t60.0<br>c59.5           | t30.0<br>c29.7         | yes   | mixed | no    | 0.80 | 2.20 | 3.00 | placebo                    | 12  |
| Stroes <sup>136</sup>    | 2018 | USA      | M127F35    | t50.3±10.6<br>c50.0±10.9 | NR                     | yes   | mixed | no    | 0.40 | 1.10 | 1.50 | olive oil                  | 12  |
| Zhou <sup>137</sup>      | 2019 | China    | M49F74     | t53.9±6.7<br>c53.6±4.2   | t25.1±1.3<br>c26.3±1.6 | yes   | no    | NR    | 0.62 | 1.23 | 1.85 | corn oil                   | 12  |
|                          |      |          |            | t54.8±4.7<br>c53.6±4.2   | t25.4±1.6<br>c26.3±1.6 | yes   | no    | NR    | 1.21 | 2.33 | 3.54 | corn oil                   | 12  |
| Fukumoto <sup>138</sup>  | 2020 | Japan    | M71F20     | t59±13<br>c60±10         | t26.2±3.6<br>c25.9±3.9 | yes   | NR    | no    | —    | 1.80 | 1.80 | placebo                    | 26  |
| Jun <sup>139</sup>       | 2020 | Korea    | M129F71    | t58.7±10.1<br>c58.0±11.4 | t27.3±3.5<br>c27.0±3.4 | yes   | yes   | no    | 1.50 | 1.86 | 3.36 | olive oil<br>+atorvastatin | 8   |
| Kita <sup>140</sup>      | 2020 | Japan    | M79F18     | t66<br>c63               | t24.3<br>c24.7         | yes   | yes   | yes   | —    | 1.80 | 1.80 | statins only               | 34  |
|                          |      |          |            | t67<br>c63               | t25.0<br>c24.7         | yes   | yes   | yes   | 0.75 | 0.93 | 1.68 | statins only               | 34  |
| Nicholls <sup>141</sup>  | 2020 | USA      | M8510F4568 | t62.5±9.0<br>c62.5±9.0   | t32.2±5.7<br>c32.2±5.6 | yes   | yes   | no    | 0.80 | 2.20 | 3.00 | corn oil                   | 52  |
| Guo <sup>142</sup>       | 2022 | China    | M41F33     | t54.7±16.6<br>c56.3±15.2 | t27.6±4.0<br>c26.7±2.4 | mixed | mixed | mixed | 1.61 | 0.74 | 2.34 | corn oil                   | 13  |

DHA, docosahexaenoic acid; EPA, eicosapentaenoic acid; HL, hyperlipidemia; NR, not reported; —, not administered. t, treatment; c, control; SD, standard deviation; and SE, standard error.

**Table S4. Estimated average dose-response relationship between DHA+EPA consumption (g/d) and lipid reduction (mg/dL)**

| Lipid                                                             | Participants          | N* | 1.0 g/d |                 | 2.0 g/d |                  | 3.0 g/d |                   | 4.0 g/d |                   | 5.0 g/d |                   |
|-------------------------------------------------------------------|-----------------------|----|---------|-----------------|---------|------------------|---------|-------------------|---------|-------------------|---------|-------------------|
|                                                                   |                       |    | MD      | (95 % CI)       | MD      | (95 % CI)        | MD      | (95 % CI)         | MD      | (95 % CI)         | MD      | (95 % CI)         |
| TG                                                                | All                   | 86 | -19.21  | (-32.01, -6.41) | -42.61  | (-53.41, -31.80) | -68.90  | (-98.40, -39.40)  | -96.05  | (-155.17, -36.94) | -123.22 | (-212.86, -33.58) |
| LDL-C                                                             | All                   | 80 | 2.91    | (0.34, 5.47)    | 3.48    | (1.09, 5.86)     | 2.43    | (-0.36, 5.22)     | 0.90    | (-4.93, 6.73)     | -0.64   | (-9.97, 8.70)     |
| HDL-C                                                             | All                   | 87 | 1.36    | (0.47, 2.25)    | 1.69    | (0.78, 2.61)     | 1.32    | (-0.97, 3.60)     | 0.73    | (-3.65, 5.10)     | 0.14    | (-6.40, 6.68)     |
| Non-HDL-C                                                         | All                   | 22 | -1.18   | (-6.24, 3.89)   | -4.13   | (-9.20, 0.95)    | -8.31   | (-11.78, -4.83)   | -12.85  | (-19.49, -6.20)   | -17.40  | (-28.95, -5.84)   |
| Hyperlipidemia status                                             |                       |    |         |                 |         |                  |         |                   |         |                   |         |                   |
| TG                                                                | Yes                   | 49 | -23.05  | (-43.59, -2.51) | -49.89  | (-63.28, -36.49) | -80.58  | (-150.43, -10.74) | -112.44 | (-259.00, 34.11)  | -144.33 | (-368.35, 79.69)  |
|                                                                   | No                    | 11 | -17.24  | (-31.01, -3.48) | -27.36  | (-45.82, -8.89)  | -32.58  | (-50.72, -14.43)  | -35.80  | (-53.93, -17.67)  | -38.87  | (-59.78, -17.97)  |
| LDL-C                                                             | Yes                   | 48 | 2.82    | (-1.25, 6.90)   | 4.17    | (0.09, 8.24)     | 4.01    | (0.50, 7.51)      | 3.39    | (-5.43, 12.21)    | 2.76    | (-12.24, 17.77)   |
|                                                                   | No                    | 10 | 7.79    | (1.83, 13.75)   | 7.64    | (1.15, 14.14)    | 2.48    | (-6.33, 11.29)    | -4.17   | (-19.57, 11.23)   | -10.85  | (-33.93, 12.22)   |
| HDL-C                                                             | Yes                   | 51 | 1.96    | (0.59, 3.34)    | 2.38    | (0.62, 4.13)     | 1.15    | (0.05, 2.26)      | -0.57   | (-1.03, -0.11)    | -2.30   | (-3.43, -1.18)    |
|                                                                   | No                    | 10 | 3.43    | (1.22, 5.63)    | 2.92    | (-0.84, 6.69)    | -0.30   | (-10.56, 9.96)    | -4.68   | (-23.44, 14.09)   | -9.16   | (-36.70, 18.37)   |
| Non-HDL-C <sup>§</sup>                                            | Yes                   | 21 | -0.89   | (-6.37, 4.58)   | -3.74   | (-9.57, 2.09)    | -8.24   | (-11.80, -4.68)   | -13.24  | (-20.14, -6.33)   | -18.24  | (-30.72, -5.76)   |
| Participants with hyperlipidemia taking lipid-lowering medication |                       |    |         |                 |         |                  |         |                   |         |                   |         |                   |
| TG                                                                | Yes                   | 22 | 1.93    | (-15.04, 18.90) | -27.96  | (-44.08, -11.84) | -98.23  | (-201.25, 4.79)   | -181.48 | (-391.95, 28.99)  | -264.99 | (-583.40, 53.43)  |
|                                                                   | No                    | 17 | -18.97  | (-46.12, 8.19)  | -52.75  | (-71.38, -34.12) | -100.71 | (-160.80, -40.61) | -152.93 | (-285.76, -20.09) | -205.23 | (-412.34, 1.88)   |
| LDL-C                                                             | Yes                   | 24 | 1.21    | (-1.49, 3.92)   | 1.06    | (-2.79, 4.91)    | -0.83   | (-3.84, 2.17)     | -3.29   | (-4.85, -1.72)    | -5.75   | (-6.36, -5.14)    |
|                                                                   | No                    | 15 | -0.41   | (-3.77, 2.95)   | 3.02    | (-0.07, 6.12)    | 10.13   | (5.57, 14.70)     | 18.36   | (7.93, 28.80)     | 26.62   | (9.85, 43.38)     |
| HDL-C                                                             | Yes                   | 24 | -0.56   | (-2.92, 1.79)   | 0.64    | (-1.41, 2.69)    | 4.09    | (-9.20, 17.38)    | 8.26    | (-19.07, 35.59)   | 12.44   | (-29.00, 53.89)   |
|                                                                   | No                    | 17 | 4.15    | (0.63, 7.66)    | 4.98    | (0.64, 9.32)     | 2.65    | (0.01, 5.28)      | -0.64   | (-1.55, 0.27)     | -3.94   | (-6.74, -1.15)    |
| Non-HDL-C                                                         | Yes                   | 13 | 1.44    | (-7.38, 10.27)  | -1.90   | (-11.46, 7.67)   | -9.59   | (-13.90, -5.27)   | -18.58  | (-27.04, -10.11)  | -27.59  | (-44.86, -10.32)  |
|                                                                   | No                    | 3  | -1.87   | (-7.72, 3.98)   | -3.52   | (-11.49, 4.46)   | -4.88   | (-10.31, 0.55)    | -6.16   | (-8.21, -4.11)    | -7.43   | (-11.26, -3.61)   |
| Baseline mean BMI                                                 |                       |    |         |                 |         |                  |         |                   |         |                   |         |                   |
| TG                                                                | ≥25 kg/m <sup>2</sup> | 53 | -25.54  | (-42.03, -9.04) | -46.86  | (-58.64, -35.08) | -65.27  | (-91.38, -39.17)  | -82.82  | (-140.21, -25.43) | -100.35 | (-190.25, -10.45) |
|                                                                   | <25 kg/m <sup>2</sup> | 22 | -5.76   | (-24.62, 13.10) | -9.23   | (-23.58, 5.12)   | -11.47  | (-82.65, 59.72)   | -13.53  | (-146.12, 119.06) | -15.60  | (-209.67, 178.47) |
| LDL-C                                                             | ≥25 kg/m <sup>2</sup> | 52 | 4.15    | (0.41, 7.89)    | 5.00    | (1.74, 8.27)     | 3.56    | (0.34, 6.79)      | 1.45    | (-6.15, 9.04)     | -0.69   | (-13.28, 11.91)   |
|                                                                   | <25 kg/m <sup>2</sup> | 20 | 1.00    | (-2.62, 4.62)   | -1.42   | (-3.50, 0.67)    | -5.83   | (-13.76, 2.10)    | -10.62  | (-26.60, 5.36)    | -15.41  | (-39.54, 8.71)    |

| Lipid                           | Participants          | N* | 1.0 g/d |                  | 2.0 g/d |                  | 3.0 g/d |                   | 4.0 g/d |                   | 5.0 g/d |                   |
|---------------------------------|-----------------------|----|---------|------------------|---------|------------------|---------|-------------------|---------|-------------------|---------|-------------------|
|                                 |                       |    | MD      | (95 % CI)        | MD      | (95 % CI)        | MD      | (95 % CI)         | MD      | (95 % CI)         | MD      | (95 % CI)         |
| HDL-C                           | ≥25 kg/m <sup>2</sup> | 55 | 1.56    | (0.76, 2.36)     | 1.78    | (0.82, 2.75)     | 1.08    | (0.15, 2.01)      | 0.10    | (-1.12, 1.33)     | -0.88   | (-2.64, 0.88)     |
|                                 | <25 kg/m <sup>2</sup> | 21 | 1.76    | (-5.20, 8.73)    | 4.69    | (-1.47, 10.85)   | 8.20    | (-12.01, 28.41)   | 11.77   | (-25.14, 48.67)   | 15.33   | (-38.48, 69.14)   |
| Non-HDL-C <sup>§</sup>          | ≥25 kg/m <sup>2</sup> | 18 | 1.19    | (-5.32, 7.69)    | -1.78   | (-8.32, 4.76)    | -7.61   | (-11.31, -3.90)   | -14.29  | (-21.21, -7.36)   | -20.99  | (-33.82, -8.15)   |
| With or without CHD             |                       |    |         |                  |         |                  |         |                   |         |                   |         |                   |
| TG                              | Yes                   | 18 | 16.89   | (-8.14, 41.92)   | -10.83  | (-34.21, 12.54)  | -74.19  | (-169.03, 20.65)  | -160.47 | (-362.13, 41.19)  | -256.94 | (-579.14, 65.26)  |
|                                 | No                    | 44 | -29.63  | (-51.31, -7.94)  | -48.07  | (-65.01, -31.13) | -58.77  | (-90.41, -27.13)  | -67.17  | (-136.20, 1.87)   | -75.53  | (-184.02, 32.97)  |
| LDL-C                           | Yes                   | 17 | -1.64   | (-4.42, 1.13)    | -1.55   | (-4.99, 1.89)    | -0.46   | (-3.48, 2.56)     | 0.91    | (-1.73, 3.54)     | 2.27    | (-0.49, 5.03)     |
|                                 | No                    | 40 | 6.11    | (1.56, 10.67)    | 7.36    | (2.99, 11.74)    | 5.24    | (1.29, 9.19)      | 2.12    | (-6.04, 10.29)    | -1.01   | (-14.50, 12.47)   |
| HDL-C                           | Yes                   | 18 | -0.71   | (-2.10, 0.67)    | -1.08   | (-3.03, 0.88)    | -1.16   | (-3.11, 0.79)     | -1.06   | (-2.82, 0.71)     | -0.88   | (-2.74, 0.99)     |
|                                 | No                    | 44 | 2.92    | (1.57, 4.28)     | 3.21    | (1.65, 4.77)     | 1.67    | (0.69, 2.66)      | -0.41   | (-0.91, 0.09)     | -2.50   | (-3.52, -1.47)    |
| Non-HDL-C <sup>§</sup>          | No                    | 15 | 0.22    | (-6.89, 7.34)    | -2.87   | (-10.07, 4.33)   | -8.27   | (-12.81, -3.73)   | -14.35  | (-22.66, -6.04)   | -20.44  | (-35.28, -5.60)   |
| Baseline mean age               |                       |    |         |                  |         |                  |         |                   |         |                   |         |                   |
| TG                              | ≥50 years             | 69 | -20.60  | (-35.58, -5.62)  | -42.12  | (-54.61, -29.63) | -64.29  | (-95.15, -33.43)  | -86.64  | (-149.26, -24.02) | -109.00 | (-204.58, -13.43) |
|                                 | <50 years             | 16 | -23.52  | (-34.09, -12.95) | -50.55  | (-81.90, -19.20) | -80.00  | (-162.64, 2.63)   | -110.48 | (-255.66, 34.70)  | -141.05 | (-350.06, 67.96)  |
| LDL-C                           | ≥50 years             | 64 | 2.77    | (-0.22, 5.77)    | 3.06    | (0.23, 5.90)     | 1.66    | (-0.71, 4.03)     | -0.22   | (-5.24, 4.81)     | -2.10   | (-10.50, 6.30)    |
|                                 | <50 years             | 15 | 6.48    | (1.36, 11.61)    | 8.11    | (1.81, 14.42)    | 6.43    | (-4.92, 17.79)    | 3.44    | (-16.87, 23.76)   | 0.36    | (-29.73, 30.45)   |
| HDL-C                           | ≥50 years             | 69 | 1.05    | (0.33, 1.77)     | 1.17    | (0.29, 2.06)     | 0.64    | (-0.20, 1.48)     | -0.08   | (-1.12, 0.96)     | -0.81   | (-2.26, 0.65)     |
|                                 | <50 years             | 17 | 5.48    | (0.82, 10.15)    | 5.43    | (-0.09, 10.95)   | 1.57    | (-4.91, 8.05)     | -3.88   | (-14.33, 6.57)    | -9.46   | (-25.15, 6.23)    |
| Duration                        |                       |    |         |                  |         |                  |         |                   |         |                   |         |                   |
| TG                              | >13 weeks             | 39 | -0.40   | (-16.57, 15.78)  | -28.66  | (-41.94, -15.38) | -74.43  | (-123.53, -25.32) | -124.43 | (-219.29, -29.57) | -174.45 | (-315.62, -33.28) |
|                                 | ≤13 weeks             | 47 | -41.97  | (-58.15, -25.78) | -59.49  | (-77.77, -41.22) | -60.11  | (-73.76, -46.46)  | -55.71  | (-72.21, -39.20)  | -51.21  | (-77.77, -24.65)  |
| LDL-C                           | >13 weeks             | 34 | 0.63    | (-2.07, 3.33)    | 0.40    | (-2.08, 2.89)    | -0.30   | (-5.65, 5.06)     | -1.07   | (-11.00, 8.86)    | -1.85   | (-16.57, 12.86)   |
|                                 | ≤13 weeks             | 46 | 4.36    | (0.64, 8.09)     | 5.31    | (0.98, 9.63)     | 3.88    | (0.73, 7.03)      | 1.75    | (-1.22, 4.72)     | -0.39   | (-5.02, 4.23)     |
| HDL-C                           | >13 weeks             | 39 | 0.70    | (-1.08, 2.49)    | 1.06    | (-0.27, 2.39)    | 1.23    | (-4.61, 7.07)     | 1.36    | (-9.74, 12.45)    | 1.49    | (-14.89, 17.87)   |
|                                 | ≤13 weeks             | 48 | 2.31    | (0.95, 3.67)     | 2.50    | (0.94, 4.07)     | 1.23    | (0.23, 2.22)      | -0.50   | (-0.95, -0.04)    | -2.23   | (-3.19, -1.26)    |
| Non-HDL-C                       | >13 weeks             | 8  | -3.95   | (-7.74, -0.16)   | -5.94   | (-9.03, -2.84)   | -6.95   | (-8.50, -5.39)    | -7.89   | (-11.91, -3.87)   | -8.83   | (-16.02, -1.64)   |
|                                 | ≤13 weeks             | 14 | 0.06    | (-8.17, 8.30)    | -3.07   | (-11.52, 5.38)   | -8.40   | (-13.21, -3.59)   | -14.39  | (-22.45, -6.34)   | -20.40  | (-35.47, -5.32)   |
| Individual effect of DHA or EPA |                       |    |         |                  |         |                  |         |                   |         |                   |         |                   |

| Lipid | Participants | N* | 1.0 g/d |                 | 2.0 g/d |                  | 3.0 g/d |                  | 4.0 g/d |                  | 5.0 g/d |                  |
|-------|--------------|----|---------|-----------------|---------|------------------|---------|------------------|---------|------------------|---------|------------------|
|       |              |    | MD      | (95 % CI)       | MD      | (95 % CI)        | MD      | (95 % CI)        | MD      | (95 % CI)        | MD      | (95 % CI)        |
| TG    | EPA only     | 20 | -14.37  | (-26.82, -1.91) | -22.52  | (-31.45, -13.59) | -29.72  | (-40.58, -18.85) | -36.92  | (-55.49, -18.35) | -44.12  | (-71.69, -16.56) |
|       | DHA only     | 5  | -17.96  | (-28.19, -7.72) | -29.61  | (-41.78, -17.45) | -37.18  | (-56.32, -18.04) | -43.17  | (-76.58, -9.76)  | -49.07  | (-98.57, 0.44)   |
| LDL-C | EPA only     | 20 | 4.26    | (-2.96, 11.48)  | 3.15    | (-4.13, 10.43)   | 0.35    | (-4.73, 5.44)    | -2.44   | (-5.36, 0.47)    | -5.24   | (-6.15, -4.33)   |
|       | DHA only     | 5  | 10.63   | (8.88, 12.38)   | 12.73   | (9.04, 16.42)    | 9.29    | (-0.82, 19.40)   | 3.72    | (-14.32, 21.76)  | -1.98   | (-28.09, 24.13)  |
| HDL-C | EPA only     | 22 | 1.18    | (-0.48, 2.83)   | 0.96    | (-0.20, 2.11)    | 0.45    | (-0.96, 1.86)    | -0.06   | (-2.61, 2.49)    | -0.56   | (-4.43, 3.30)    |
|       | DHA only     | 5  | 3.17    | (0.69, 5.65)    | 4.57    | (1.83, 7.30)     | 4.81    | (1.61, 8.00)     | 4.61    | (-0.85, 10.06)   | 4.38    | (-3.96, 12.72)   |

CI indicates the confidence interval; DHA, docosahexaenoic acid; EPA, eicosapentaenoic acid; HDL-C, high-density lipoprotein cholesterol; LDL-C, low-density lipoprotein cholesterol; MD, mean difference; non-HDL-C, non-high-density lipoprotein cholesterol; TG, triglyceride.

Note: \*Numbers may not be added to group totals due to missing data or unspecified subgroups in the trials.

§Due to the unavailability of data, only one subgroup estimate was performed in the absence or presence of hyperlipidemia, overweight/obesity ( $\geq 25$  kg/m<sup>2</sup>), and pre-existing CHD.

**Table S5. Estimated average dose-response relationship between the achieved changes of red blood cell (RBC) index and lipid level reduction**

| BP        | Participants | N  | Index increased by 50% |                  | Index increased by 100% |                  | Index increased by 150% |                  | Index increased by 200% |                   | Index increased by 250% |                  |
|-----------|--------------|----|------------------------|------------------|-------------------------|------------------|-------------------------|------------------|-------------------------|-------------------|-------------------------|------------------|
|           |              |    | MD                     | (95 % CI)        | MD                      | (95 % CI)        | MD                      | (95 % CI)        | MD                      | (95 % CI)         | MD                      | (95 % CI)        |
| TG        | All          | 28 | -24.97                 | (-35.61, -14.33) | -43.62                  | (-58.50, -28.74) | -58.72                  | (-93.76, -23.69) | -73.32                  | (-133.37, -13.26) | -87.91                  | (-173.63, -2.18) |
| LDL-C     | All          | 26 | 1.50                   | (-0.52, 3.52)    | 1.34                    | (-0.89, 3.57)    | 0.26                    | (-4.35, 4.86)    | -0.97                   | (-9.08, 7.15)     | -2.19                   | (-13.98, 9.60)   |
| HDL-C     | All          | 28 | 1.49                   | (0.30, 2.69)     | 2.59                    | (0.32, 4.85)     | 3.46                    | (-2.84, 9.76)    | 4.30                    | (-6.49, 15.10)    | 5.15                    | (-10.19, 20.48)  |
| Non-HDL-C | All          | 4  | -1.35                  | (-10.05, 7.34)   | -2.85                   | (-13.35, 7.66)   | -4.50                   | (-11.18, 2.19)   | -6.20                   | (-15.85, 3.45)    | -7.90                   | (-25.65, 9.85)   |

CI, confidence interval; DHA, docosahexaenoic acid; HDL-C, high-density lipoprotein cholesterol; LDL-C, low-density lipoprotein cholesterol; MD, mean difference; Non-HDL-C, non-high-density lipoprotein cholesterol; TG, triglyceride.

**Table S6: Risk of bias of included 90 trials in lipid profile study**

| Author                    | Year | Randomization | Blinding     | Missing outcome | Measurement  | Selection of results | Overall |
|---------------------------|------|---------------|--------------|-----------------|--------------|----------------------|---------|
| Flaten <sup>57</sup>      | 1990 | some concern  | some concern | low             | medium       | medium               | medium  |
| Hendra <sup>58</sup>      | 1990 | some concern  | some concern | low             | low          | medium               | low     |
| Reis <sup>59</sup>        | 1990 | some concern  | medium       | low             | low          | low                  | low     |
| Bonaa <sup>60</sup>       | 1992 | some concern  | some concern | low             | some concern | low                  | low     |
| Kaul <sup>61</sup>        | 1992 | high          | high         | low             | low          | low                  | low     |
| Leaf <sup>62</sup>        | 1994 | low           | low          | low             | low          | low                  | low     |
| Sacks <sup>63</sup>       | 1995 | some concern  | low          | some concern    | low          | low                  | low     |
| Shimizu <sup>64</sup>     | 1995 | medium        | medium       | low             | low          | medium               | medium  |
| Eritsland <sup>65</sup>   | 1996 | low           | medium       | low             | low          | low                  | low     |
| Grimsgaard <sup>66</sup>  | 1997 | low           | low          | low             | low          | low                  | low     |
| Harris <sup>67</sup>      | 1997 | low           | some concern | low             | low          | low                  | low     |
| Sirtori <sup>68</sup>     | 1997 | low           | low          | low             | low          | low                  | low     |
| Borthwick <sup>69</sup>   | 1998 | some concern  | low          | low             | low          | low                  | low     |
| Nordoy <sup>70</sup>      | 1998 | some concern  | low          | low             | low          | low                  | low     |
| Johansen <sup>71</sup>    | 1999 | low           | low          | low             | low          | low                  | low     |
| von Schacky <sup>72</sup> | 1999 | low           | low          | low             | low          | low                  | low     |
| Mori <sup>73</sup>        | 2000 | some concern  | low          | low             | low          | low                  | low     |
| Durrington <sup>74</sup>  | 2001 | some concern  | some concern | low             | low          | low                  | low     |
| Finnegan <sup>75</sup>    | 2003 | some concern  | medium       | low             | low          | low                  | low     |
| Hamazaki <sup>76</sup>    | 2003 | some concern  | low          | low             | low          | low                  | low     |
| Dyerberg <sup>77</sup>    | 2004 | medium        | medium       | low             | low          | low                  | low     |
| Hjerkinn <sup>78</sup>    | 2005 | low           | low          | low             | low          | low                  | low     |
| Maki <sup>79</sup>        | 2005 | some concern  | medium       | low             | low          | low                  | low     |
| Geppert <sup>80</sup>     | 2006 | medium        | medium       | low             | low          | low                  | low     |
| Lee <sup>81</sup>         | 2006 | low           | high         | low             | low          | low                  | low     |
| Sanders <sup>82</sup>     | 2006 | medium        | medium       | low             | low          | low                  | low     |
| Davidson <sup>83</sup>    | 2007 | medium        | medium       | low             | low          | low                  | low     |
| Mita <sup>84</sup>        | 2007 | high          | low          | low             | low          | low                  | low     |
| Satoh <sup>85</sup>       | 2007 | medium        | medium       | low             | low          | low                  | low     |
| Kaul <sup>86</sup>        | 2008 | medium        | medium       | low             | low          | low                  | low     |
| Saito <sup>87</sup>       | 2008 | low           | low          | low             | low          | low                  | low     |
| Shidfar <sup>88</sup>     | 2008 | high          | high         | low             | low          | low                  | low     |
| Ebrahimi <sup>89</sup>    | 2009 | high          | high         | medium          | low          | low                  | high    |
| Hartwich <sup>90</sup>    | 2009 | medium        | medium       | low             | low          | low                  | low     |
| Khandelwal <sup>91</sup>  | 2009 | low           | medium       | low             | low          | low                  | low     |
| Nomura <sup>92</sup>      | 2009 | low           | medium       | low             | low          | low                  | low     |
| Rizza <sup>93</sup>       | 2009 | medium        | low          | low             | low          | low                  | low     |
| Satoh <sup>94</sup>       | 2009 | medium        | medium       | low             | low          | low                  | low     |
| Bays <sup>95</sup>        | 2010 | medium        | medium       | medium          | low          | low                  | medium  |
| Hallund <sup>96</sup>     | 2010 | medium        | medium       | low             | low          | low                  | low     |



|                              |      |              |              |        |        |        |      |
|------------------------------|------|--------------|--------------|--------|--------|--------|------|
| Kromhout <sup>97</sup>       | 2010 | low          | low          | low    | low    | low    | low  |
| Neil <sup>98</sup>           | 2010 | low          | low          | low    | low    | low    | low  |
| Zhang <sup>99</sup>          | 2010 | some concern | medium       | low    | low    | low    | low  |
| Bays <sup>100</sup>          | 2011 | some concern | high         | low    | low    | low    | low  |
| Itakura <sup>101</sup>       | 2011 | low          | low          | low    | low    | low    | low  |
| Kim <sup>102</sup>           | 2011 | some concern | high         | low    | low    | low    | low  |
| Krysiak <sup>103</sup>       | 2011 | some concern | high         | low    | low    | low    | low  |
| Krysiak <sup>104</sup>       | 2011 | some concern | high         | low    | low    | low    | low  |
| Nodari <sup>105</sup>        | 2011 | low          | low          | low    | low    | low    | low  |
| Sanders <sup>106</sup>       | 2011 | low          | low          | medium | low    | low    | low  |
| Schuchardt <sup>107</sup>    | 2011 | low          | low          | medium | low    | low    | low  |
| Takaki <sup>108</sup>        | 2011 | low          | medium       | low    | low    | low    | low  |
| Tierney <sup>109</sup>       | 2011 | low          | medium       | low    | low    | low    | low  |
| Agouridis <sup>110</sup>     | 2012 | low          | high         | medium | low    | low    | high |
| Ballantyne <sup>111</sup>    | 2012 | low          | low          | low    | low    | low    | low  |
| Derosa <sup>112</sup>        | 2012 | low          | low          | low    | low    | low    | low  |
| Bosch <sup>20</sup>          | 2012 | low          | low          | low    | low    | low    | low  |
| Koh <sup>113</sup>           | 2012 | low          | medium       | low    | low    | low    | low  |
| Satoh-Asahara <sup>114</sup> | 2012 | some concern | some concern | low    | low    | low    | low  |
| Flock <sup>115</sup>         | 2013 | some concern | some concern | low    | medium | low    | low  |
| Roncaglioni <sup>21</sup>    | 2013 | low          | low          | low    | low    | low    | low  |
| Hlais <sup>116</sup>         | 2013 | low          | medium       | low    | low    | low    | low  |
| Maki <sup>47</sup>           | 2013 | low          | low          | low    | low    | low    | low  |
| Tani <sup>117</sup>          | 2013 | low          | medium       | low    | low    | low    | low  |
| Maki <sup>118</sup>          | 2014 | low          | some concern | low    | low    | low    | low  |
| Oh <sup>119</sup>            | 2014 | low          | medium       | low    | low    | low    | low  |
| Scorletti <sup>120</sup>     | 2014 | some concern | some concern | low    | low    | low    | low  |
| Toyama <sup>121</sup>        | 2014 | some concern | medium       | low    | low    | low    | low  |
| Mansoori <sup>122</sup>      | 2015 | some concern | some concern | low    | low    | low    | low  |
| Qin <sup>48</sup>            | 2015 | low          | some concern | low    | low    | low    | low  |
| Ahn <sup>123</sup>           | 2016 | low          | low          | low    | low    | low    | low  |
| Bays <sup>124</sup>          | 2016 | low          | low          | low    | low    | low    | low  |
| Derosa <sup>125</sup>        | 2016 | low          | low          | low    | low    | low    | low  |
| Koh <sup>126</sup>           | 2016 | low          | medium       | low    | low    | low    | low  |
| Sawada <sup>127</sup>        | 2016 | low          | medium       | low    | low    | low    | low  |
| Su <sup>128</sup>            | 2017 | low          | low          | low    | low    | low    | low  |
| Tani <sup>129</sup>          | 2017 | low          | medium       | low    | low    | low    | low  |
| Tani <sup>130</sup>          | 2017 | low          | medium       | low    | low    | low    | low  |
| Toth <sup>131</sup>          | 2017 | low          | some concern | low    | low    | medium | low  |
| Watanabe <sup>132</sup>      | 2017 | low          | high         | low    | low    | low    | low  |
| Group <sup>133</sup>         | 2018 | low          | low          | low    | low    | low    | low  |
| Kim <sup>134</sup>           | 2018 | low          | some concern | low    | low    | low    | low  |

|                          |      |      |      |              |     |              |      |
|--------------------------|------|------|------|--------------|-----|--------------|------|
| Oscarsson <sup>135</sup> | 2018 | low  | low  | some concern | low | some concern | low  |
| Stroes <sup>136</sup>    | 2018 | low  | low  | low          | low | low          | low  |
| Zhou <sup>137</sup>      | 2019 | low  | low  | low          | low | low          | low  |
| Fukumoto <sup>138</sup>  | 2020 | high | high | low          | low | medium       | high |
| Jun <sup>139</sup>       | 2020 | low  | low  | low          | low | low          | low  |
| Kita <sup>140</sup>      | 2020 | low  | high | low          | low | low          | low  |
| Nicholls <sup>24</sup>   | 2020 | low  | low  | low          | low | low          | low  |
| Guo <sup>141</sup>       | 2022 | low  | low  | low          | low | low          | low  |

Note: Two review authors independently assessed the risk of bias of each included trial in the domains of randomization (random sequence generation); blinding (allocation concealment, blinding of participants and personnel, and blinding of outcome assessors); missing outcome (incomplete outcome data); measurement (method and measurement bias); and selection of results (reporting bias).

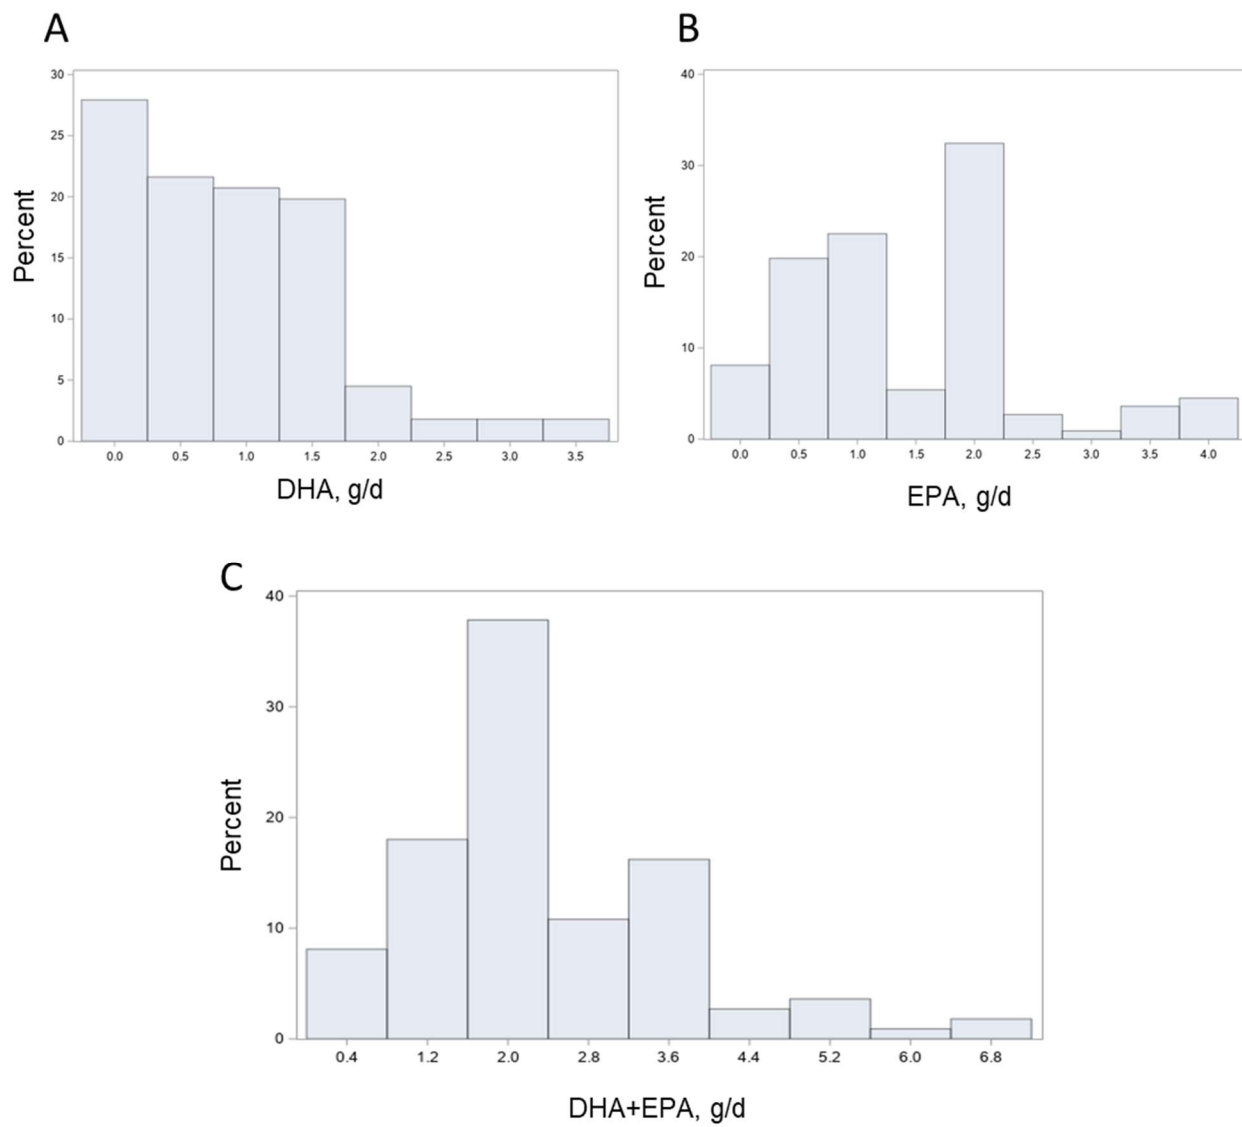

**Figure S1: Histogram of dose distribution of 90 RCTs.** A, Histogram of docosahexaenoic acid (DHA) dose (g/d). B, Histogram of eicosapentaenoic acid (EPA) dose (g/d). C, Histogram of the total dose (DHA+EPA, g/d).

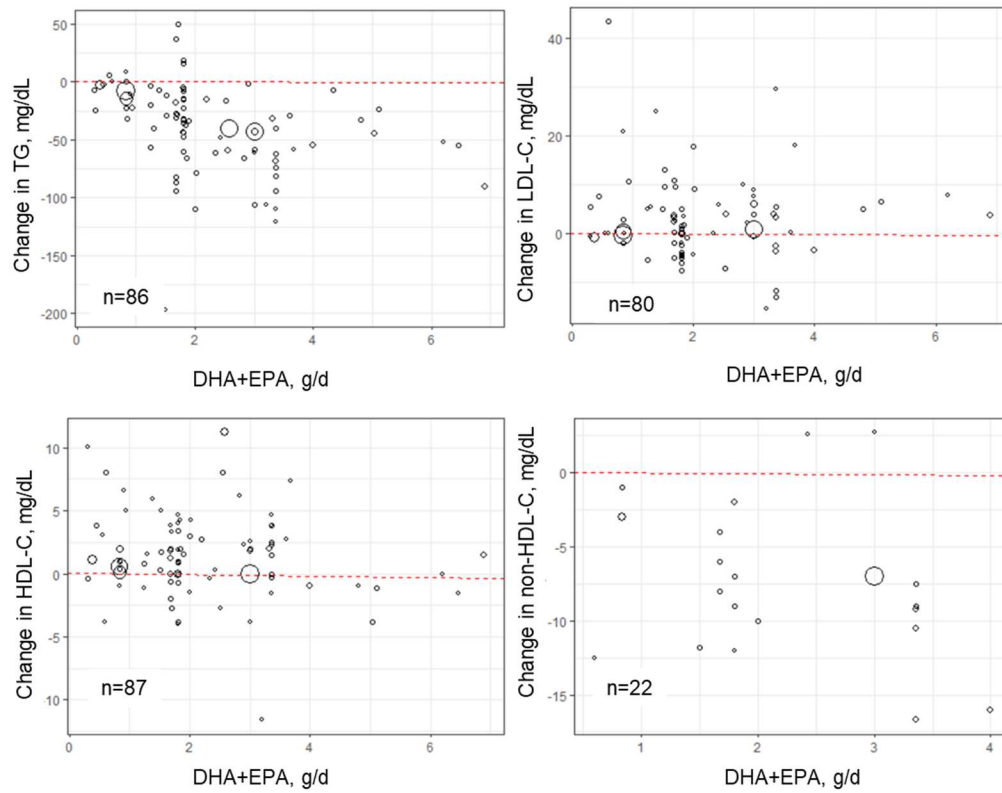

**Figure S2. Scatterplot of the included trials.** Studies included n=86 for triglyceride (TG), n=80 for low-density lipoprotein cholesterol (LDL-C), n=87 for high-density lipoprotein cholesterol (HDL-C), and n=22 for non-high-density lipoprotein cholesterol (non-HDL-C). Dashed red lines indicate referent changes and the bubble size is the inverse of the standard error of each exposure level.

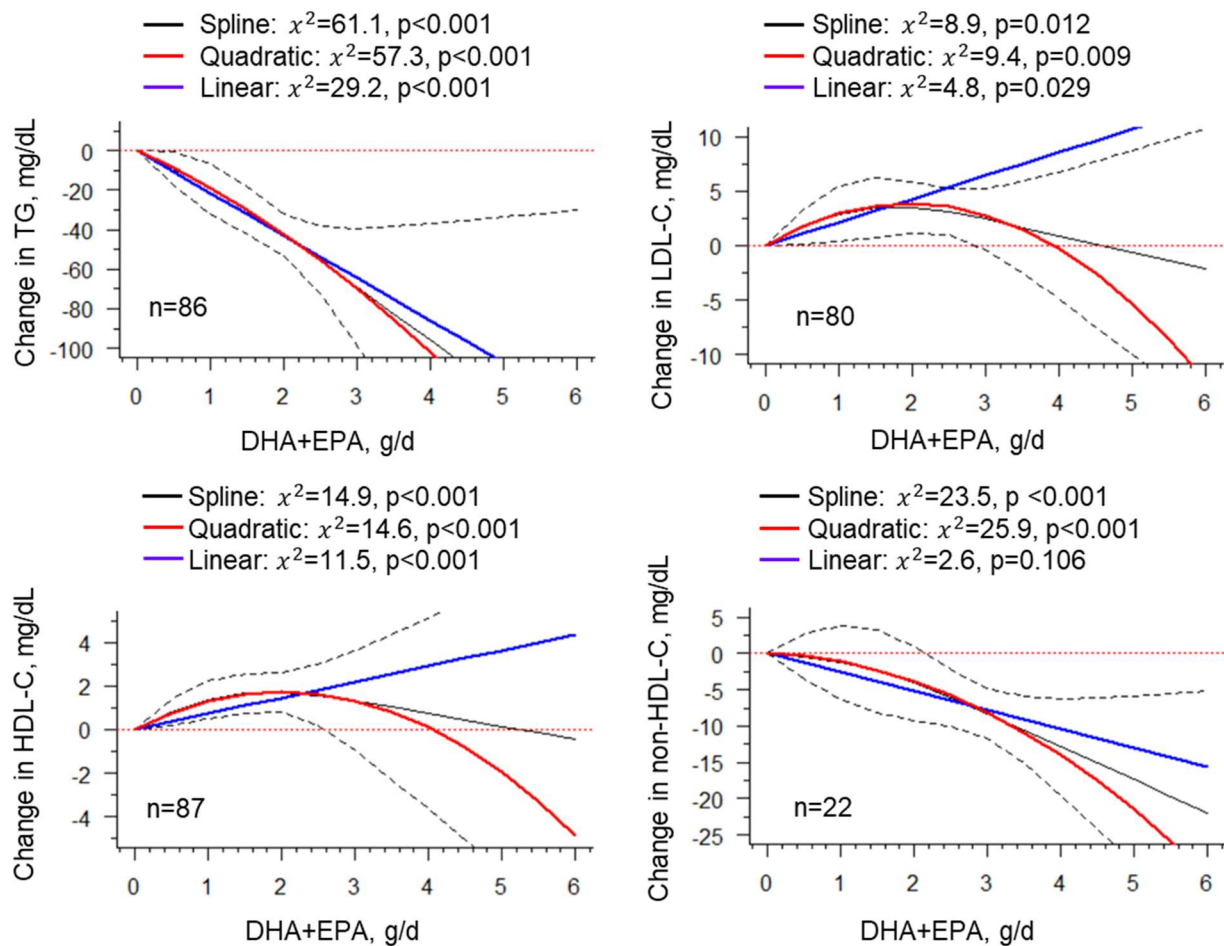

**Figure S3. Model comparison.** In each panel, the solid black line indicates the restricted cubic spline model, the red solid line indicates the quadratic model, and the blue solid line indicates the linear model, respectively. Dashed black lines are 95% point-wise CIs estimated by a 1-stage random-effects restricted cubic spline model.

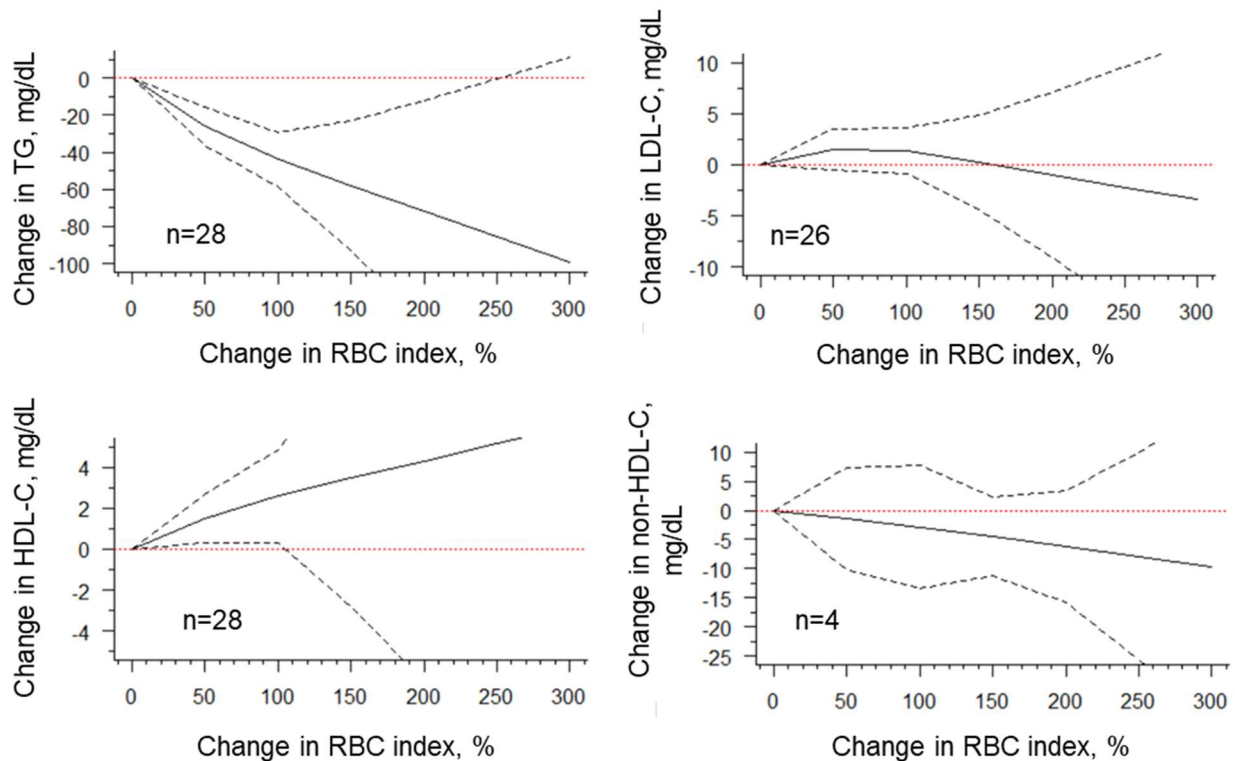

**Figure S4: Dose-response relationship between changes in lipids and achieved increment of red blood cell (RBC) omega index.**

Marginal average dose-response curve (solid line) with 95% point-wise CIs (dashed lines) estimated by a 1-stage random-effects restricted cubic spline model, using 0 g/d as the referent. RBC omega index change is the achieved increment of EPA+DHA percentage in total fatty acids integrated into the RBC membrane. Studies included n=28 for triglyceride (TG), n=26 for low-density lipoprotein cholesterol (LDL-C), n=28 for high-density lipoprotein cholesterol (HDL-C), and n=4 for non-high-density lipoprotein cholesterol (non-HDL-C). Non-HDL-C analysis only includes the trials that reported non-HDL-C data.

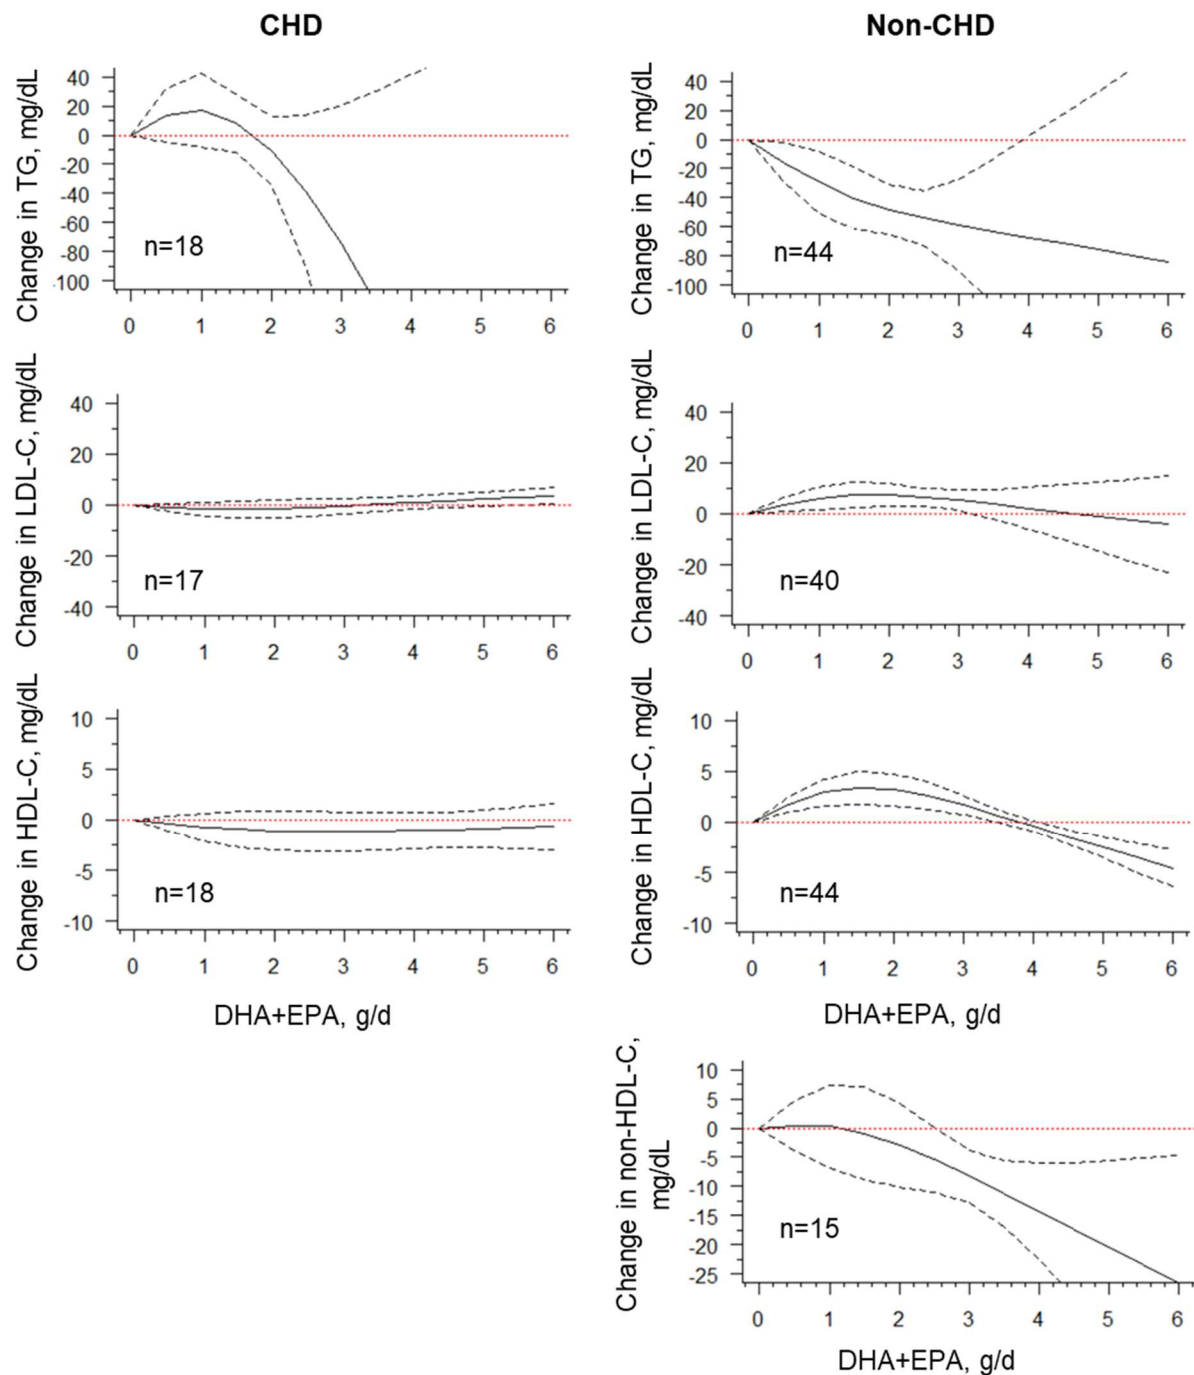

**Figure S5: Dose-response relationship between changes in lipids and combined docosahexaenoic acid (DHA)+eicosapentaenoic acid (EPA) intake of the studies stratified by pre-existing coronary heart diseases.**

Marginal average dose-response curve (solid line) with 95% point-wise CIs (dashed lines) estimated by a 1-stage random-effects restricted cubic spline model, using 0 g/day as the referent, in participants with or without coronary heart diseases. CHD indicates coronary heart disease. n indicates the number of the included study.

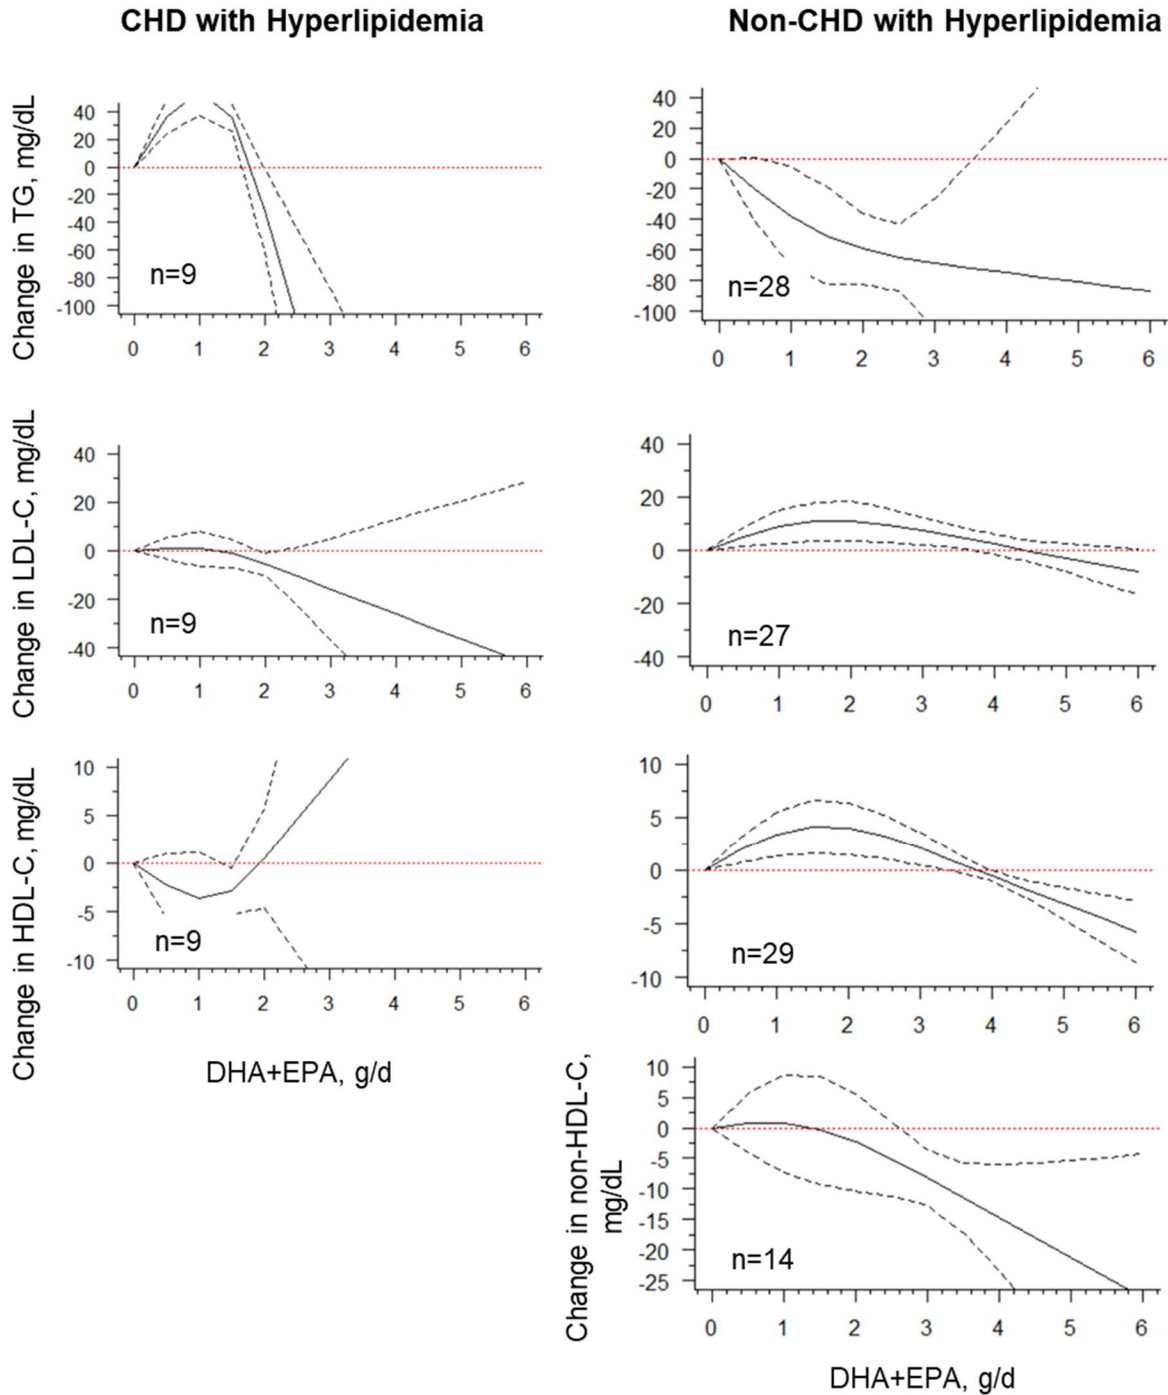

**Figure S6: Dose-response relationship between changes in lipids and combined docosahexaenoic acid (DHA)+eicosapentaenoic acid (EPA) intake of the studies stratified in patients with hyperlipidemia with or without pre-existing coronary heart diseases.**

Marginal average dose-response curve (solid line) with 95% point-wise CIs (dashed lines) estimated by a 1-stage random-effects restricted cubic spline model, using 0 g/day as the referent, in participants with or without coronary heart diseases. CHD indicates coronary heart disease. n indicates the number of the included study.



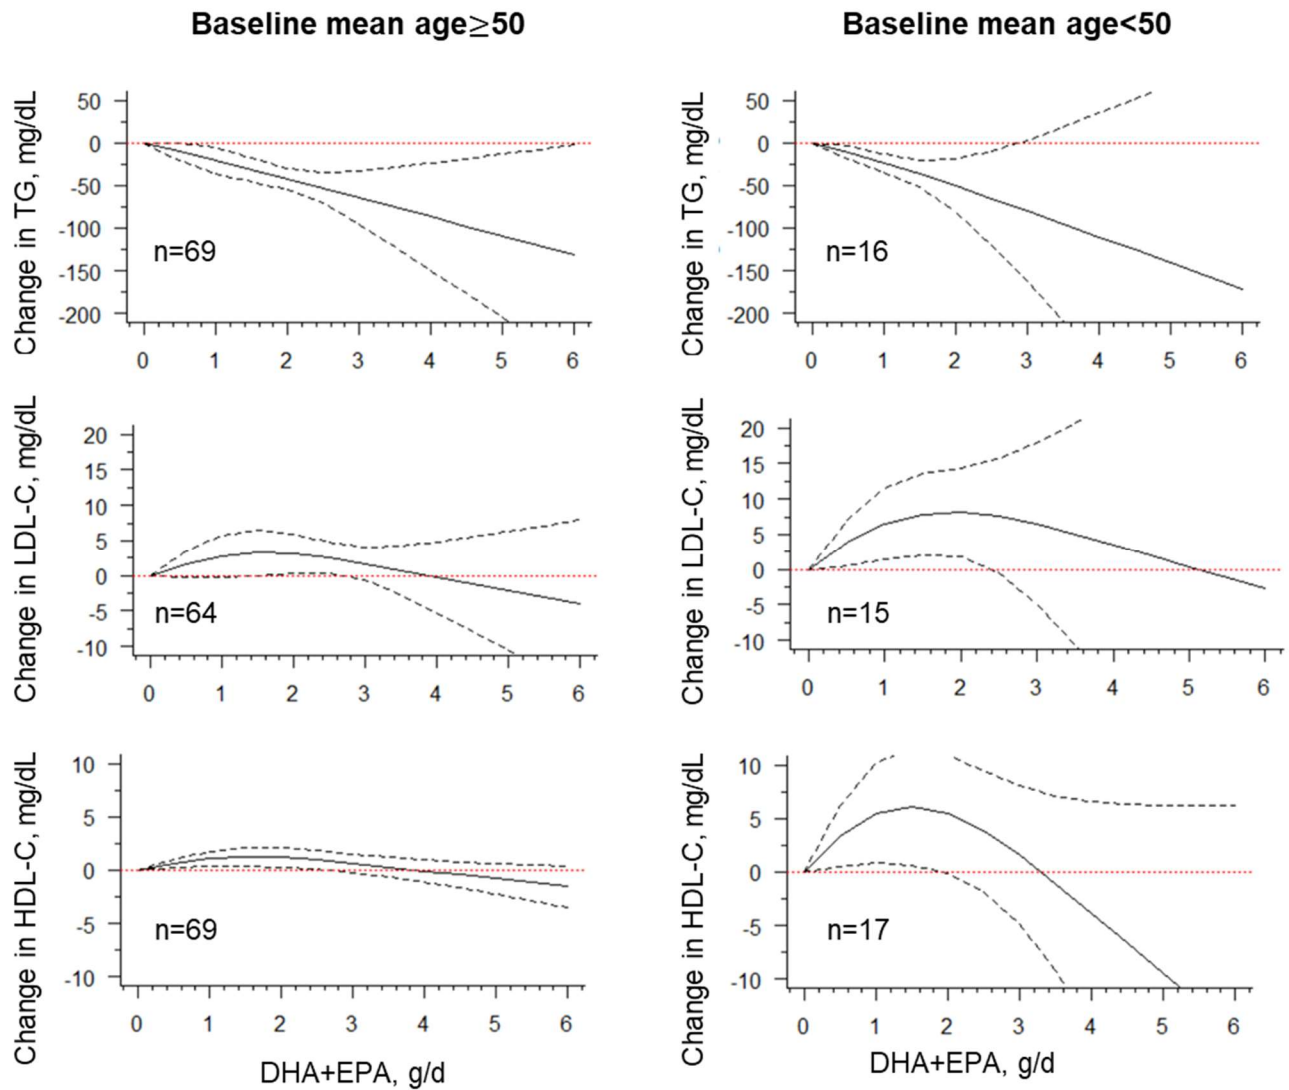

**Figure S7. Dose-response relation between changes in lipids and combined docosahexaenoic acid (DHA)+eicosapentaenoic acid (EPA) intake of the studies stratified by baseline mean of age.**

Marginal average dose-response curve (solid line) with 95% point-wise CIs (dashed lines) estimated by a 1-stage random-effects restricted cubic spline model, using 0 g/day as the referent, in participants of baseline mean of age  $\geq 50$  or  $<50$  years. n indicates the number of the included study.

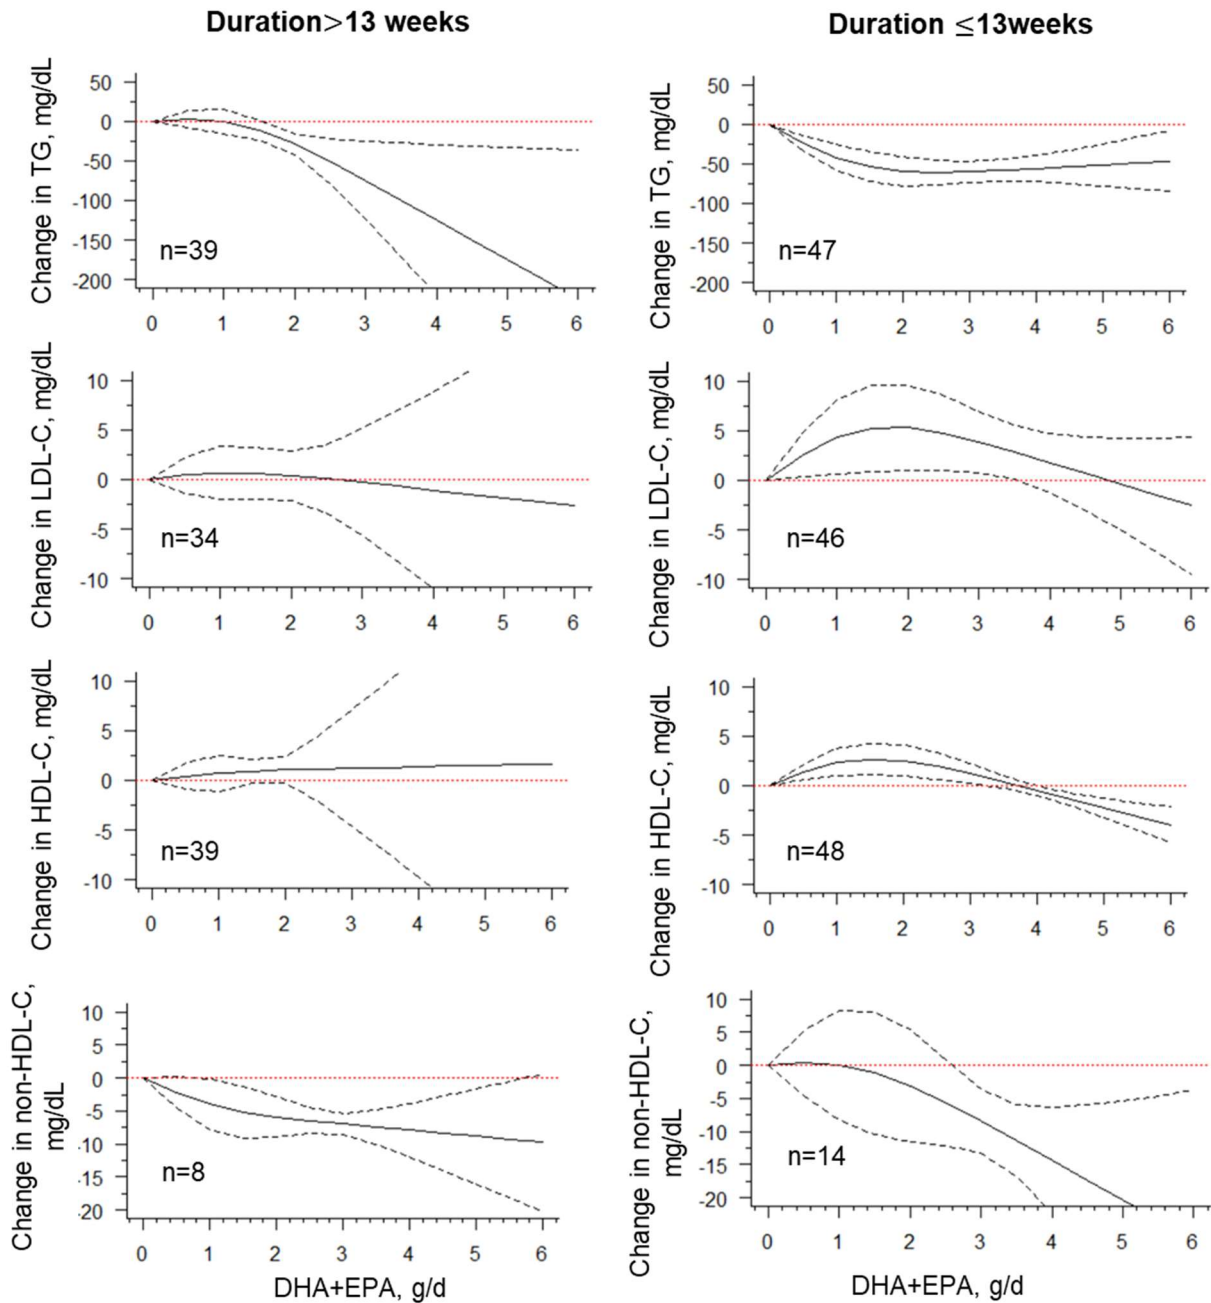

**Figure S8. Dose-response relationship between changes in lipids and combined docosahexaenoic acid (DHA)+eicosapentaenoic acid (EPA) intake of the studies stratified by trial duration.**

Marginal average dose-response curve (solid line) with 95% point-wise CIs (dashed lines) estimated by a 1-stage random-effects restricted cubic spline model, using 0 g/day as the referent, in participants with trial duration  $\leq 13$  or  $>13$  weeks. n indicates the number of the included study.

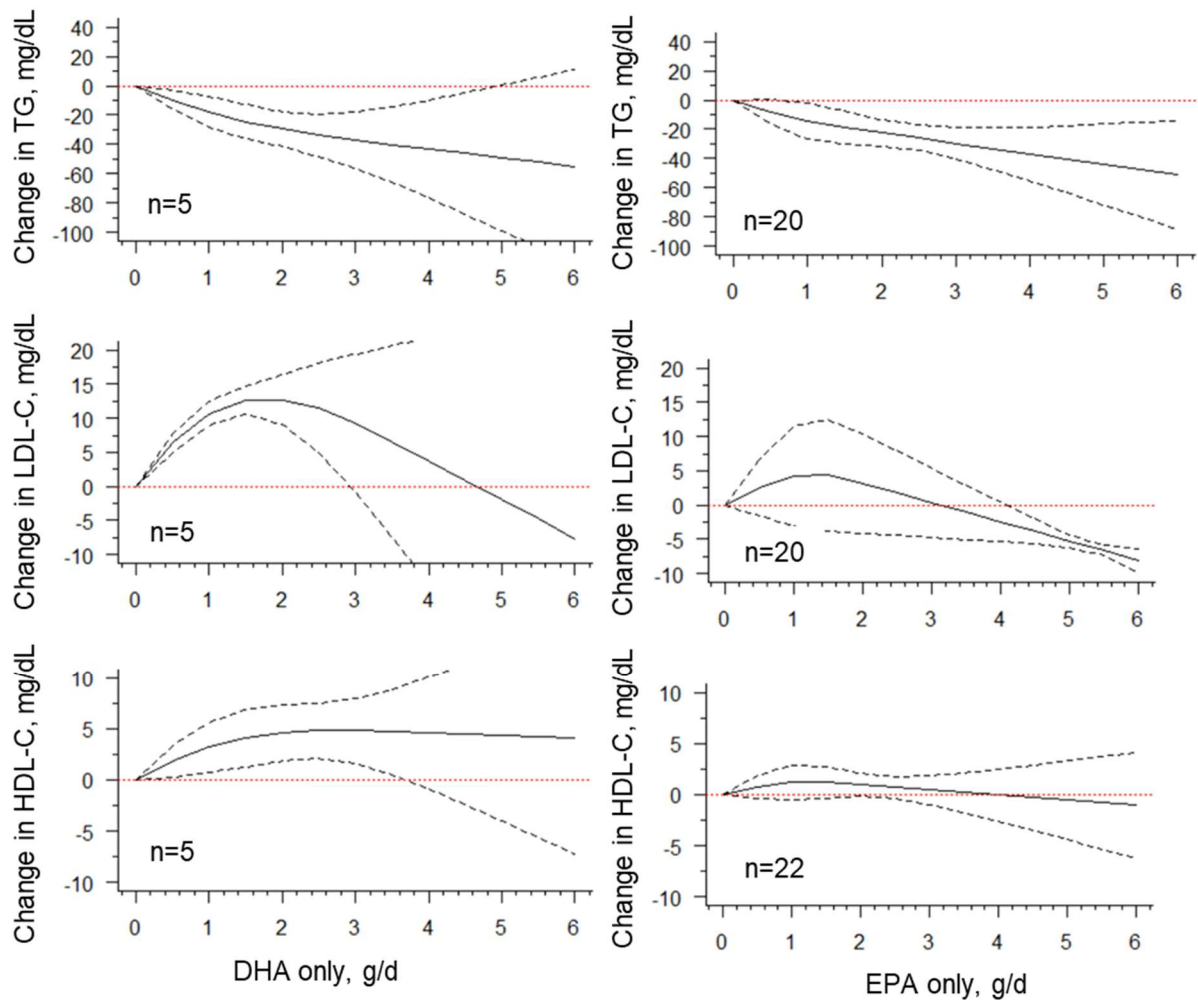

**Figure S9: Dose-response relationship between changes in lipids and docosahexaenoic acid (DHA)+eicosapentaenoic acid (EPA) intake of the studies stratified by the individual fish oils, either DHA or EPA only.**

Marginal average dose-response curve (solid line) with 95% point-wise CIs (dashed lines) estimated by a 1-stage random-effects restricted cubic spline model, using 0 g/day as the referent, in studies using DHA or EPA alone. n indicates the number of the included study.

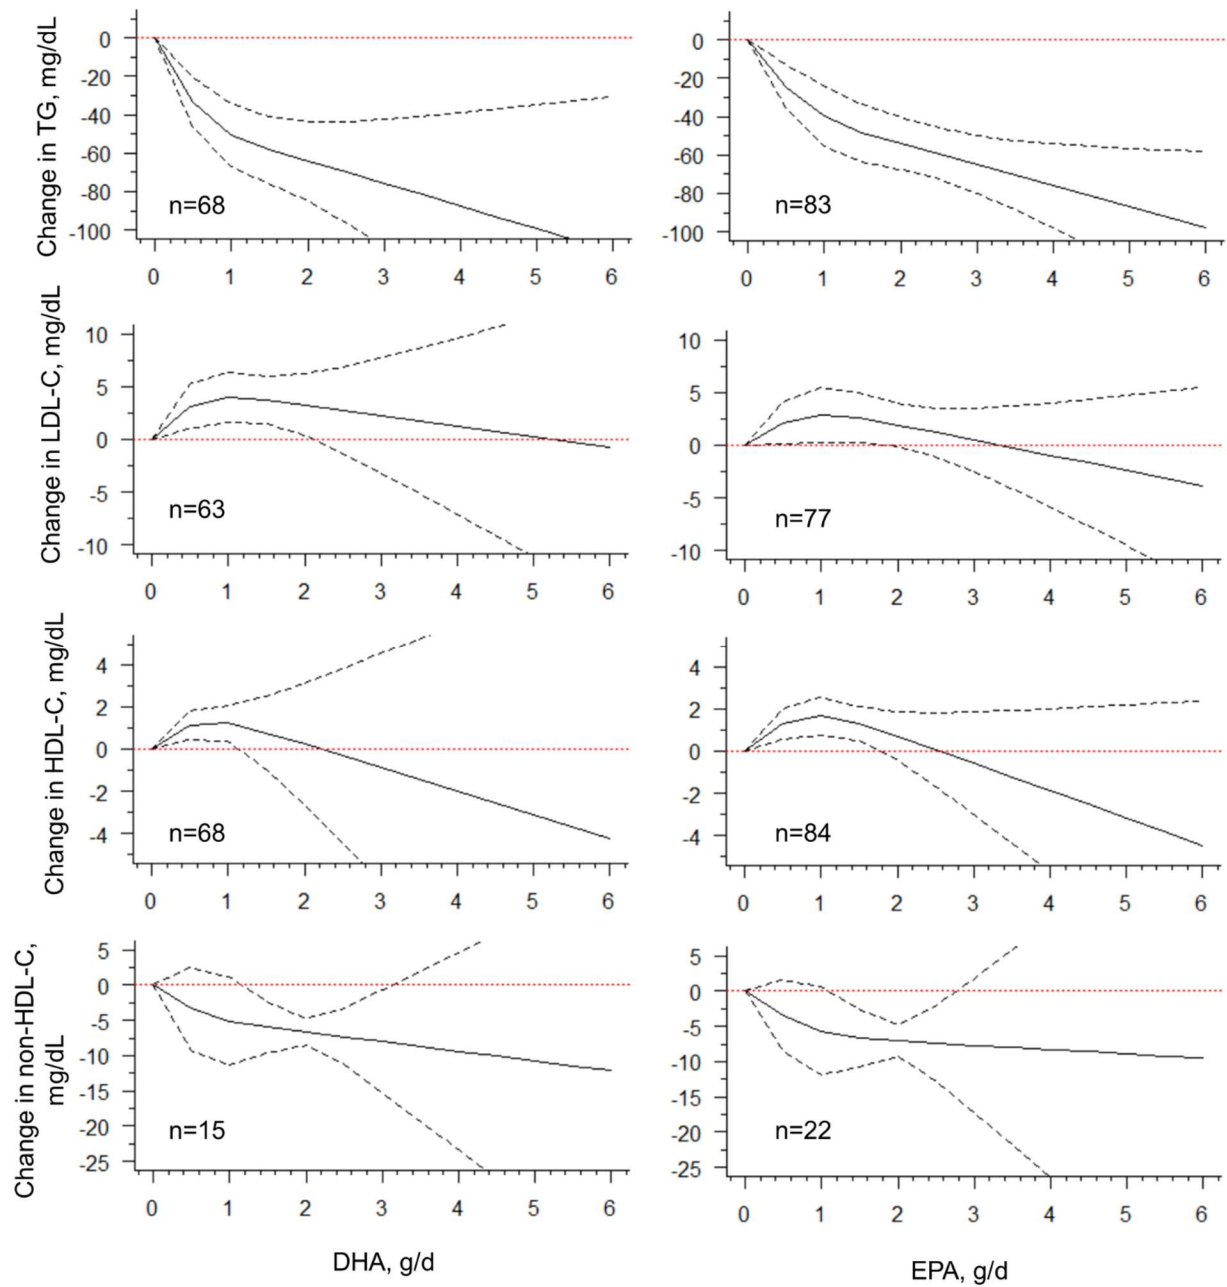

**Figure S10: Dose-response relationship between changes in lipids and separate docosahexaenoic acid (DHA) or eicosapentaenoic acid (EPA) intake.**

Marginal average dose-response curve (solid line) with 95% point-wise CIs (dashed lines) estimated by a 1-stage random-effects restricted cubic spline model, using 0 g/day as the referent. n indicates the number of the included study.

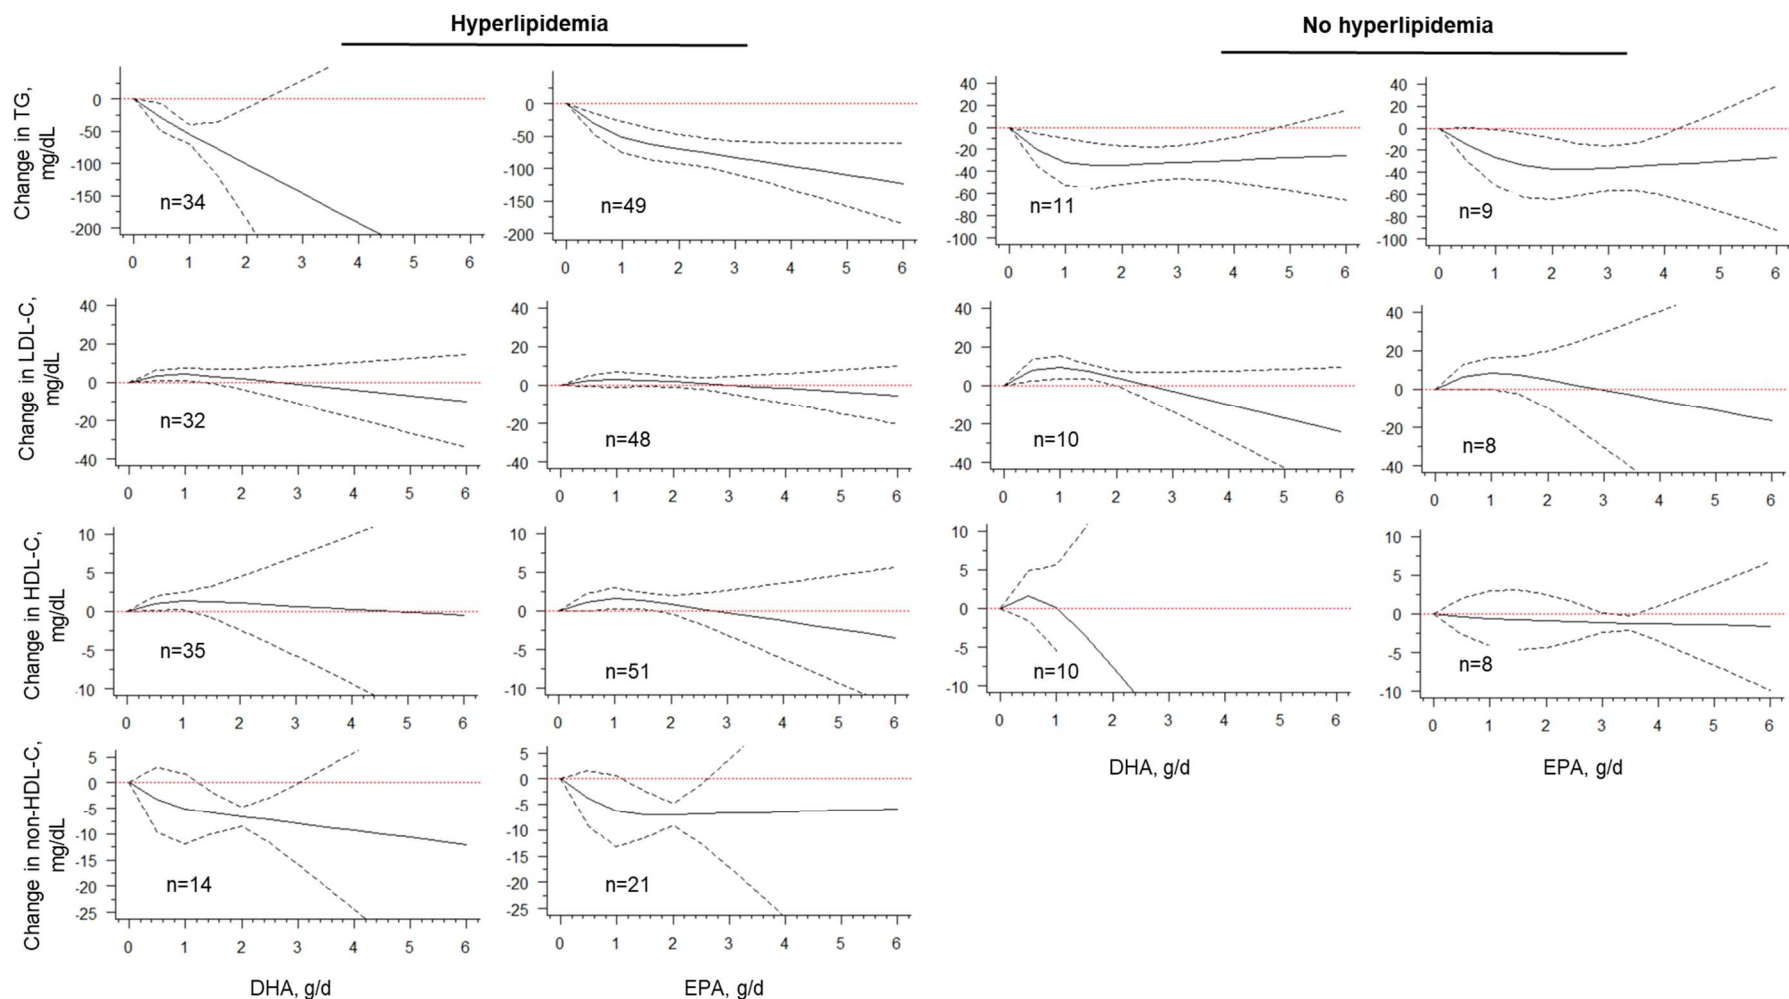

**Figure S11. Dose-response relationship between changes in lipids and separate intake of docosahexaenoic acid (DHA) or eicosapentaenoic acid (EPA) of studies stratified by hyperlipidemia status.**

Marginal average dose-response curve (solid line) with 95% point-wise CIs (dashed lines) estimated by a 1-stage random-effects restricted cubic spline model, using 0 g/day as a reference, in participants with or without hyperlipidemia. n indicates the number of the included study.

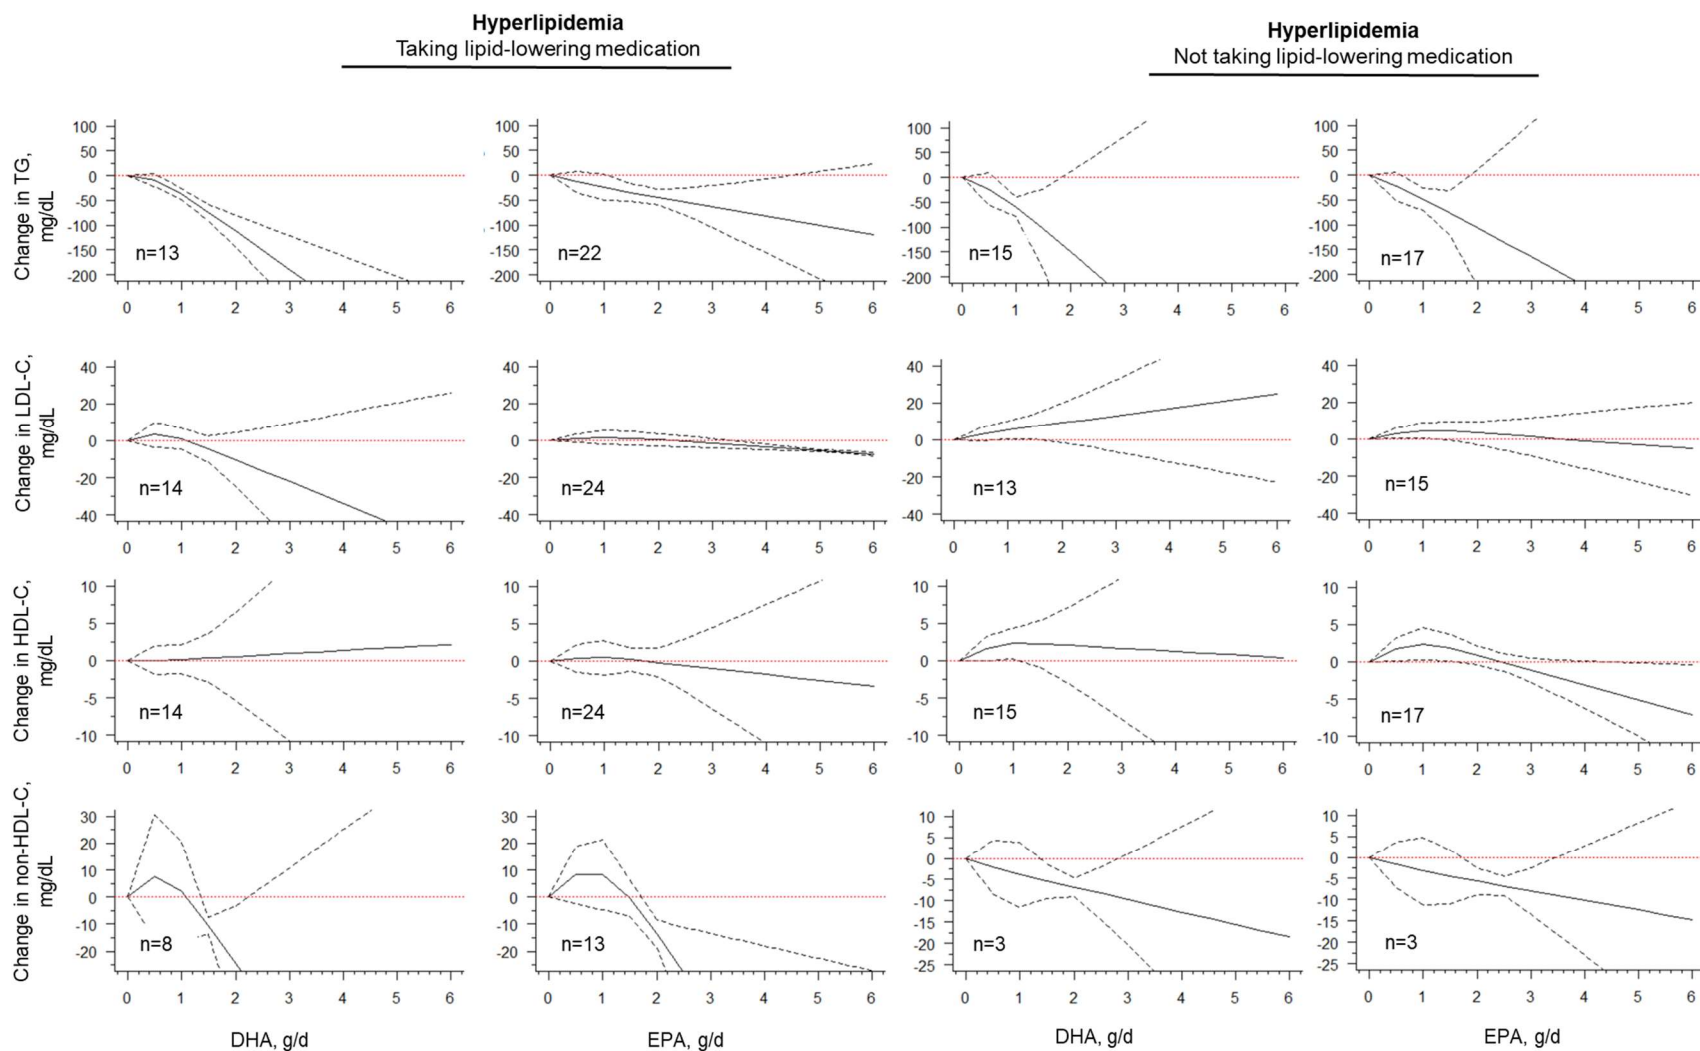

**Figure S12. Subgroup analysis for changes in lipids and separate intake of docosahexaenoic acid (DHA) or eicosapentaenoic acid (EPA) among hyperlipidemic participants.** Marginal average dose-response curve (solid line) with 95% point-wise CIs (dashed lines) estimated by a 1-stage random-effects restricted cubic spline model, using 0 g/day as a reference, in participants taking or not taking lipid-lowering medications. n indicates the number of the included study.



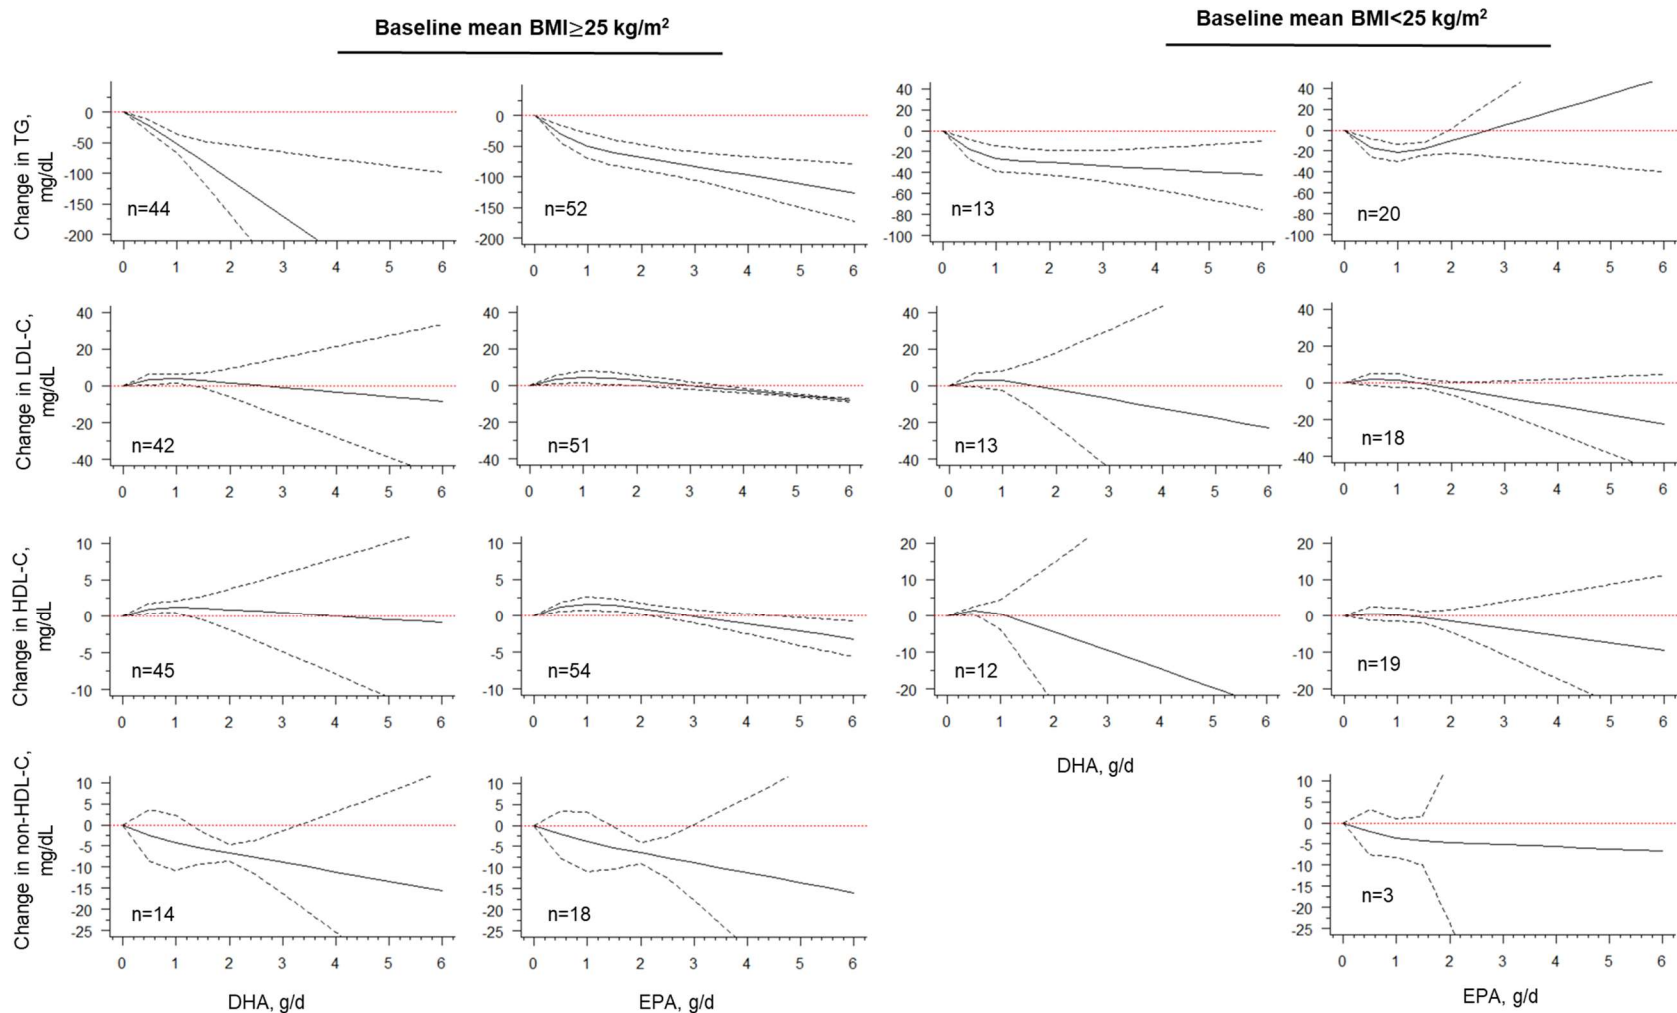

**Figure S13. Dose-response relationship between changes in lipids and separate intake of docosahexaenoic acid (DHA) or eicosapentaenoic acid (EPA) of the studies stratified by overweight/obesity classified by the baseline mean of body mass index (BMI).** Marginal average dose-response curve (solid line) with 95% point-wise CIs (dashed lines) estimated by a 1-stage random-effects restricted cubic spline model, using 0 g/day as a reference, among participants with a mean BMI  $\geq 25$  or  $< 25$  kg/m<sup>2</sup>. n indicates the number of the included study.

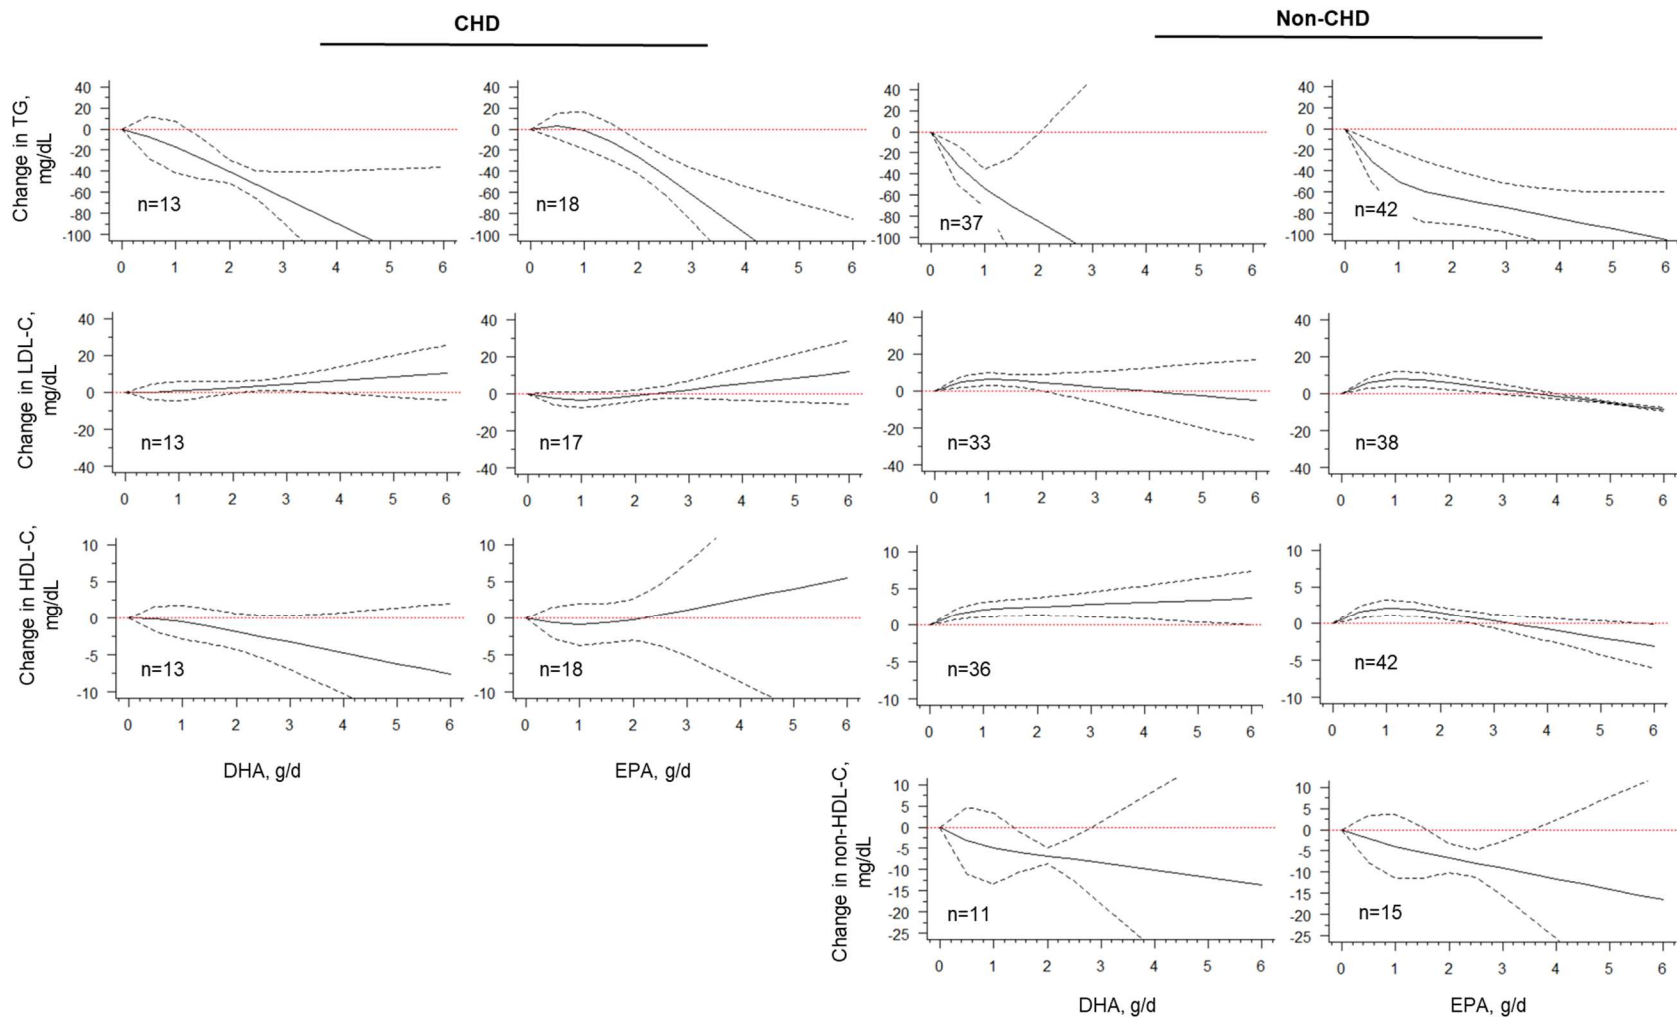

**Figure S14: Dose-response relationship between changes in lipids and separate intake of docosahexaenoic acid (DHA) or eicosapentaenoic acid (EPA) stratified by pre-existing coronary heart diseases.**

Marginal average dose-response curve (solid line) with 95% point-wise CIs (dashed lines) estimated by a 1-stage random-effects restricted cubic spline model, using 0 g/day as the referent, in participants with or without coronary heart diseases. CHD indicates coronary heart disease. n indicates the number of the included study.



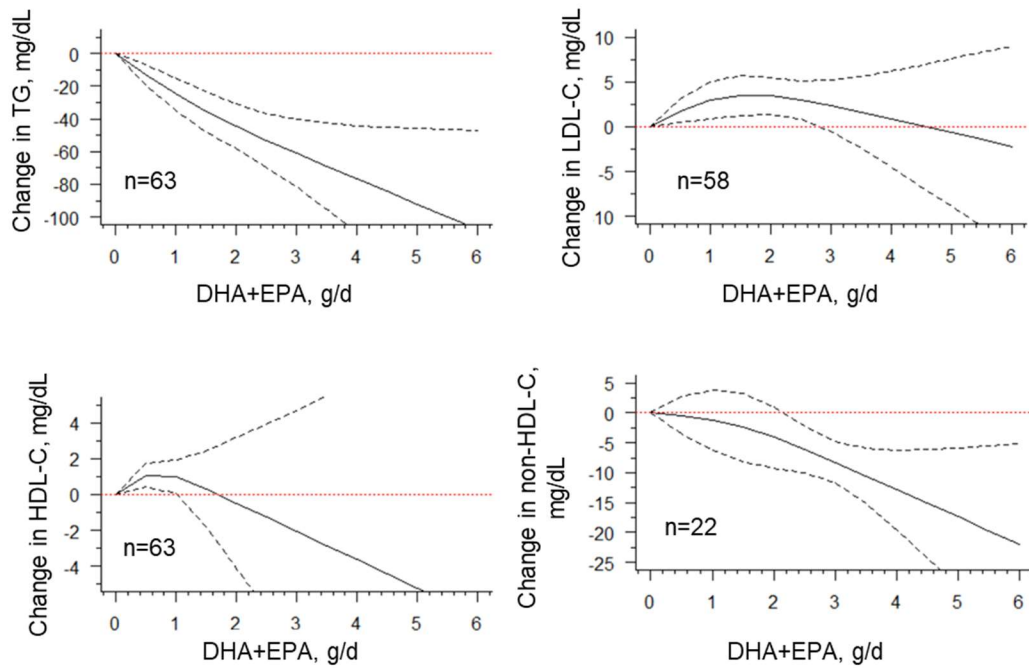

**Figure S15: Dose-response relationship between changes in lipids and combined docosahexaenoic acid (DHA) and eicosapentaenoic acid (EPA) intake dosage, with the removal of DHA/EPA monotherapy.**

Marginal average dose-response curve (solid line) with 95% point-wise CIs (dashed lines) estimated by a 1-stage random-effects restricted cubic spline model, using 0 g/day as the referent. n indicates the number of the included study.

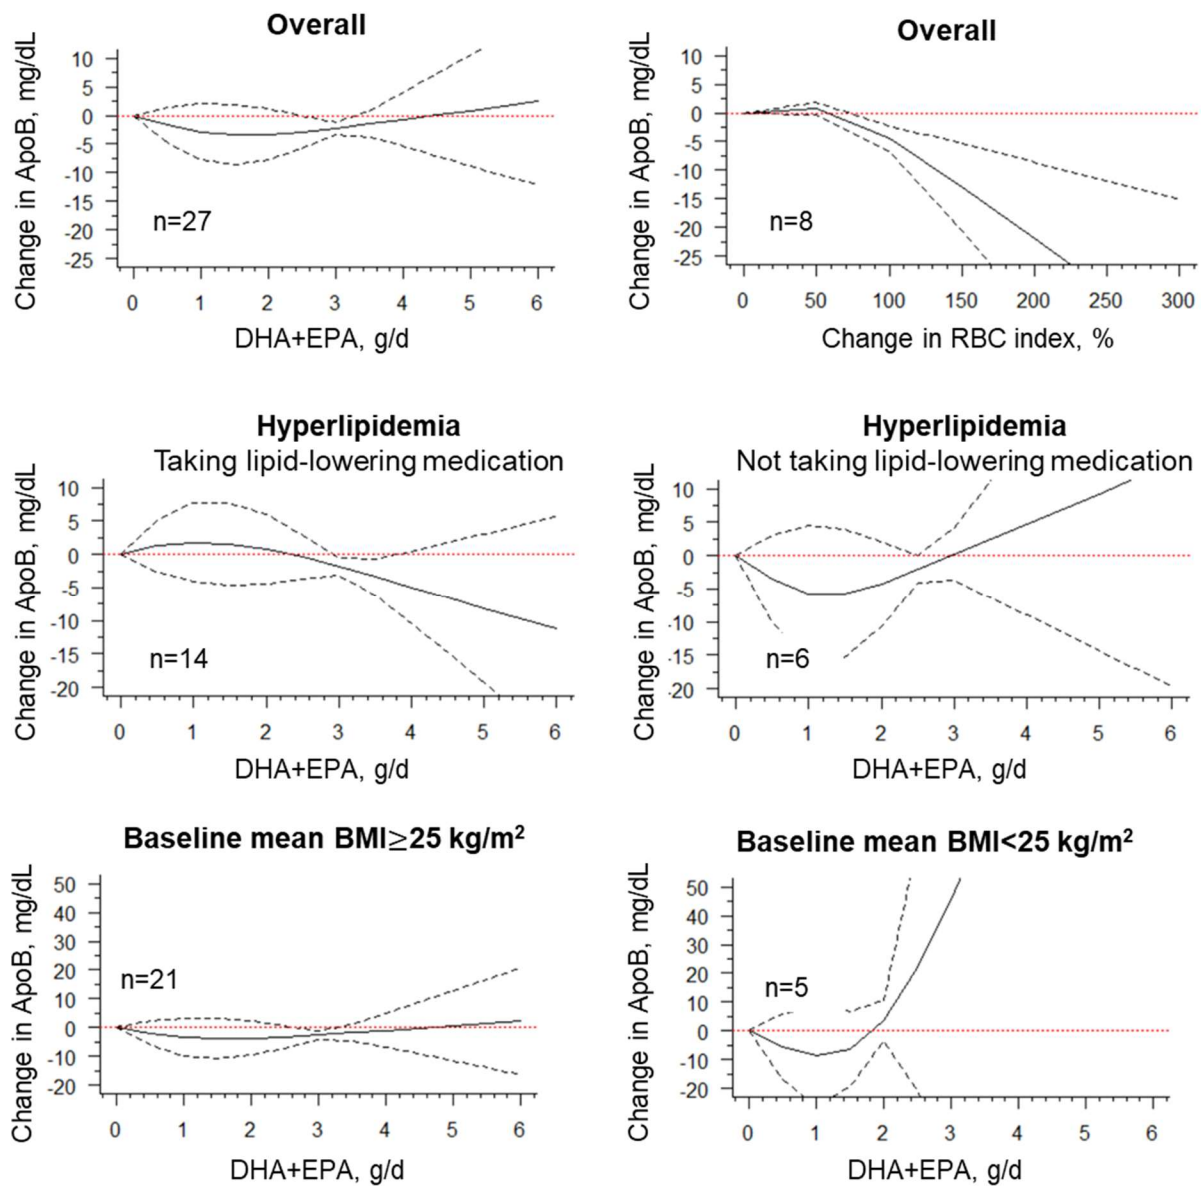

**Figure S16: Dose-response relationship between changes in ApoB and docosahexaenoic acid (DHA)+eicosapentaenoic acid (an EPA) intake or red blood cells (RBC) omega index.** Marginal average dose-response curve (solid line) with 95% point-wise CIs (dashed lines) estimated by a 1-stage random-effects restricted cubic spline model, using 0 g/day or 0 % RBC omega change as the referent. n indicates the number of the included study.

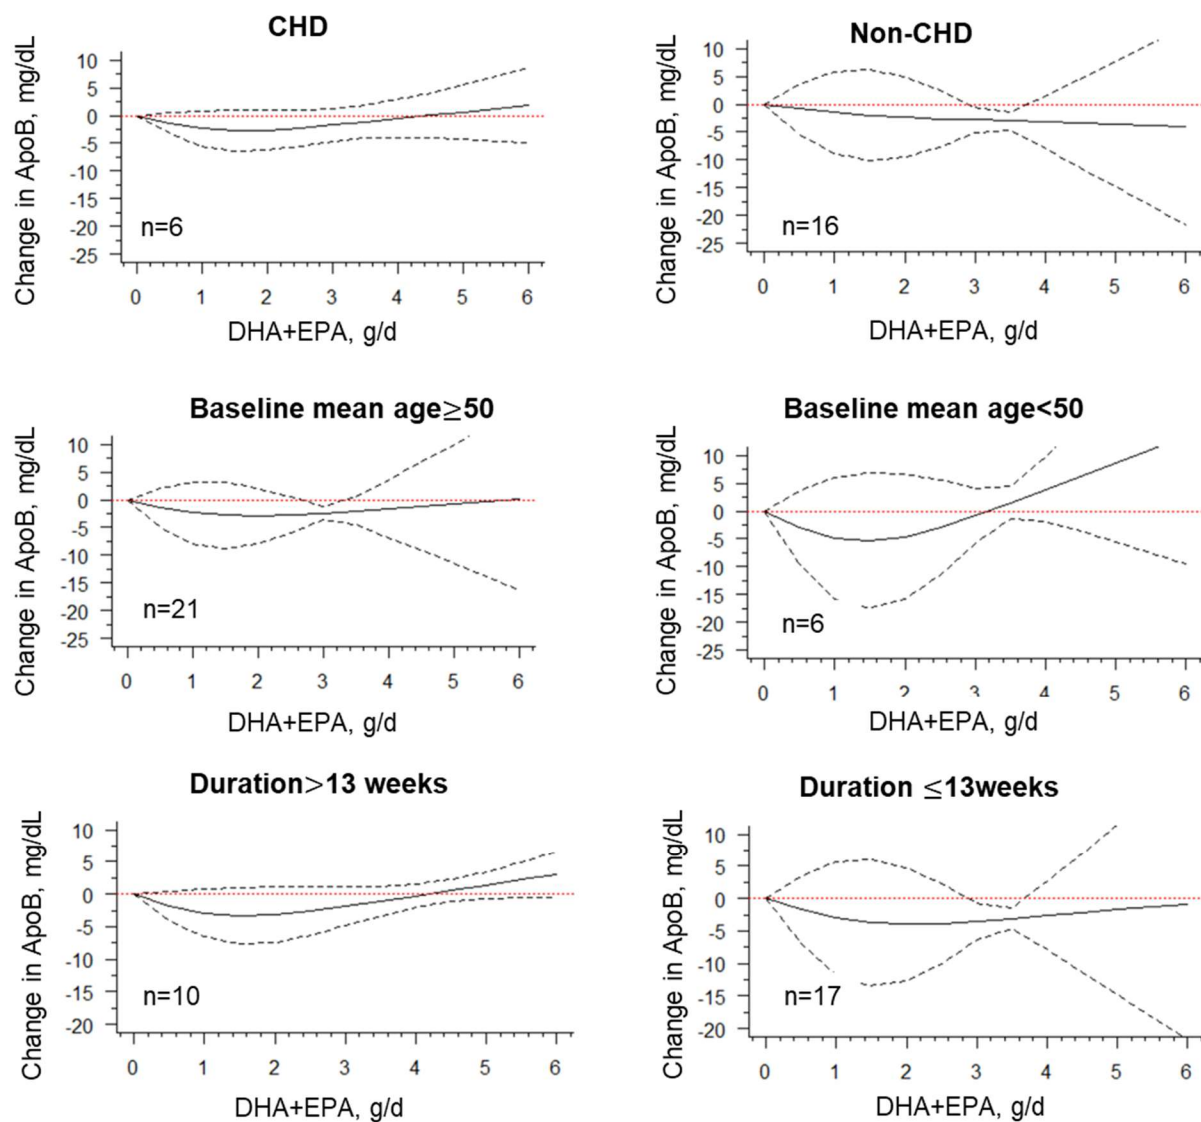

**Figure S17: Dose-response relationship between changes in ApoB and docosahexaenoic acid (DHA)+eicosapentaenoic acid (EPA) intake.**

Marginal average dose-response curve (solid line) with 95% point-wise CIs (dashed lines) estimated by a 1-stage random-effects restricted cubic spline model, using 0 g/day as the referent. n indicates the number of the included study.

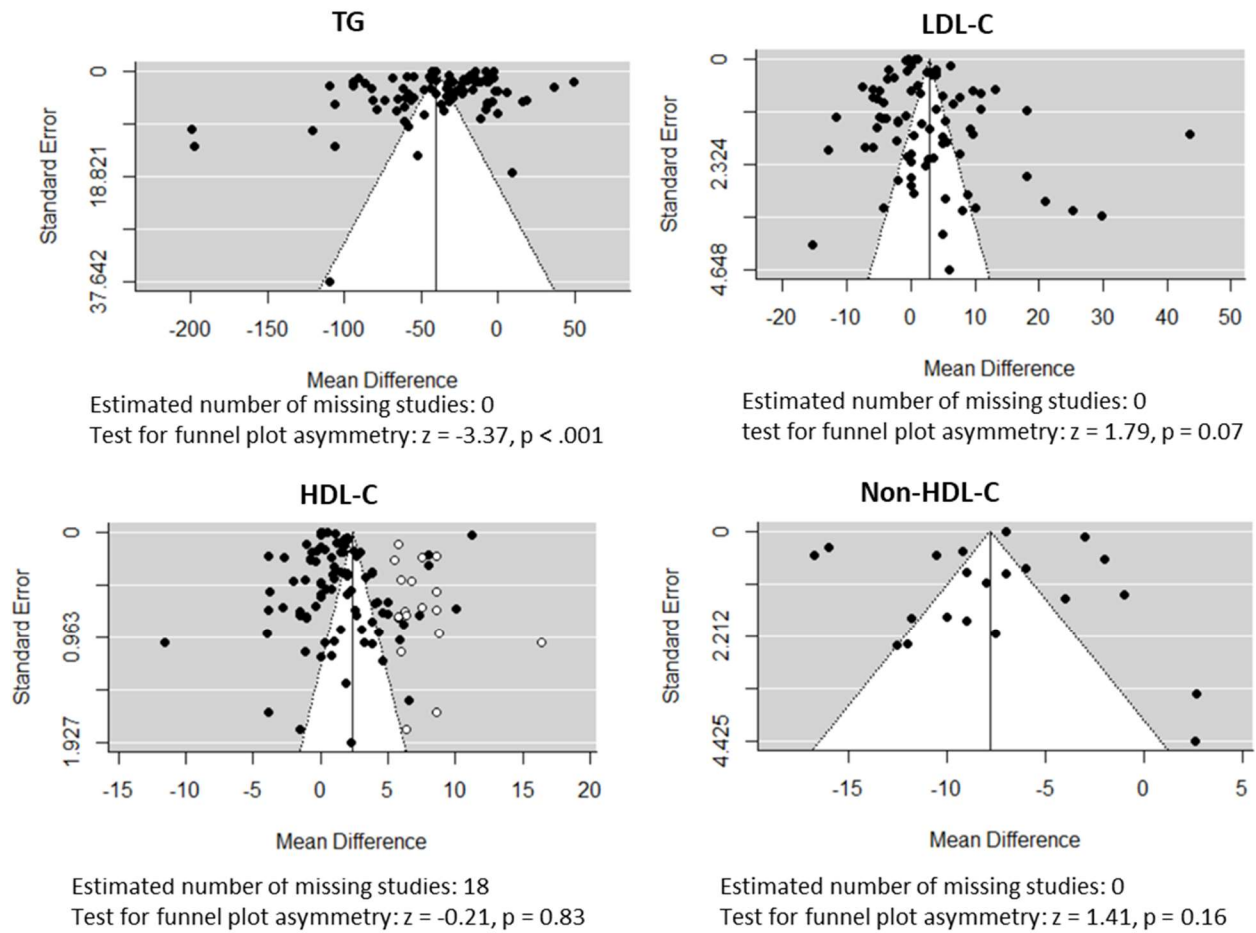

**Figure S18: Funnel plots for assessment of overall publication bias.**

The plots are generated for the mean difference of changes in TG, LDL-C, HDL-C, and non-HDL-C levels as mg/dL and its standard error using the trim-and-fill method. Filled and unfilled dots indicate observed and imputed studies, respectively. The grey area indicates  $p \leq 0.05$ . The plot asymmetry analysis was performed by Egger's regression test.

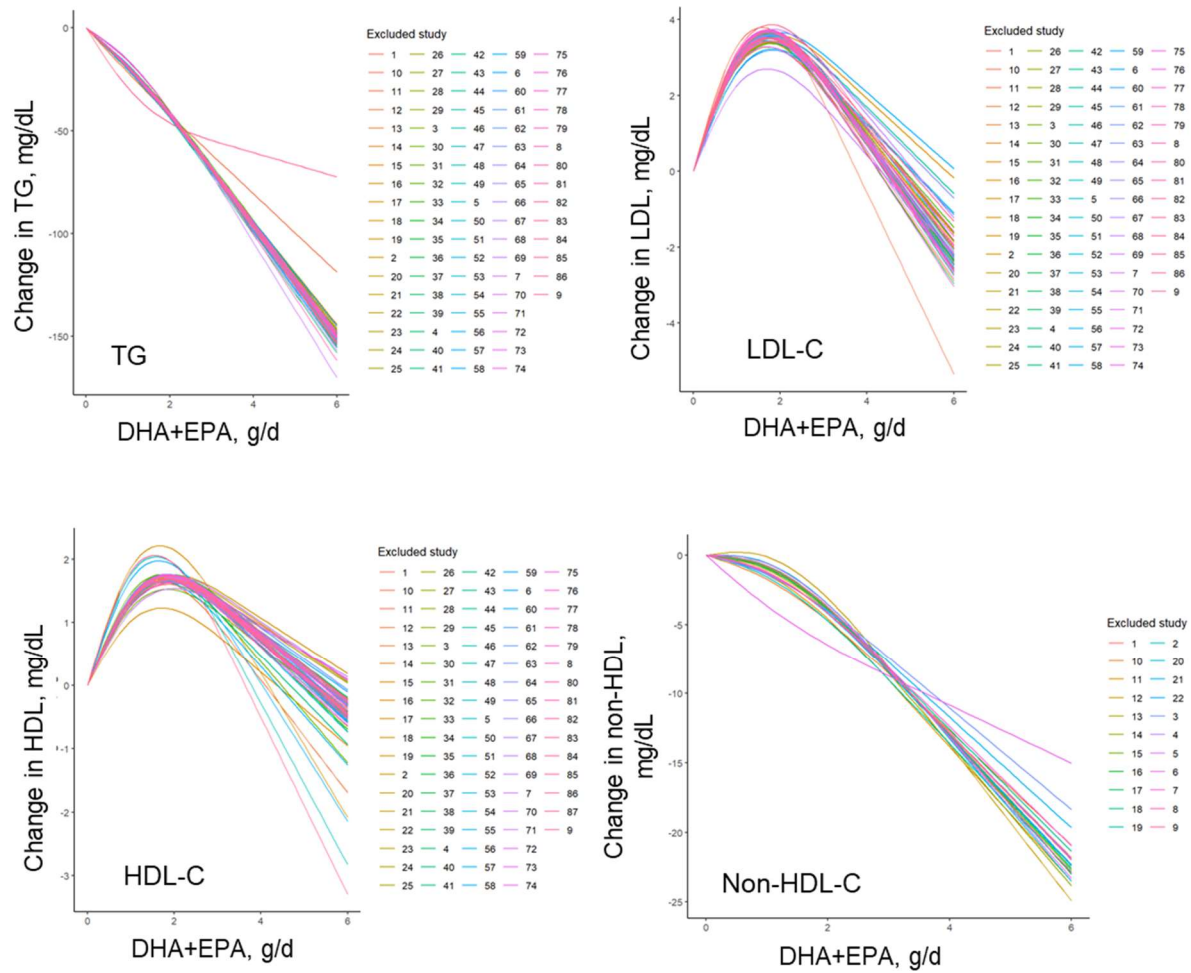

**Figure S19: Sensitivity analysis of overall effects of docosahexaenoic acid (DHA)+eicosapentaenoic acid (EPA) on lipids**

Sensitivity analysis of mean difference for changes in TG, LDL-C, HDL-C, and non-HDL-C levels between DHA+EPA treatment and placebo groups, using the leave-one-out method where each time one study is omitted to compute the pooled estimate in the 1-stage regression model.
